# Supplementary material for: Comparative Genetic Mapping and Discovery of Linkage Disequilibrium Across Linkage Groups in White Clover (Trifolium repens L.)
Source: PubMed Central journal article supplement (PMC3362943; doi:10.1534/g3.112.002600), 2012-05-01
Supplement: supp_2.5.607_002600SI.pdf [file supp_2.5.607_002600SI.pdf]

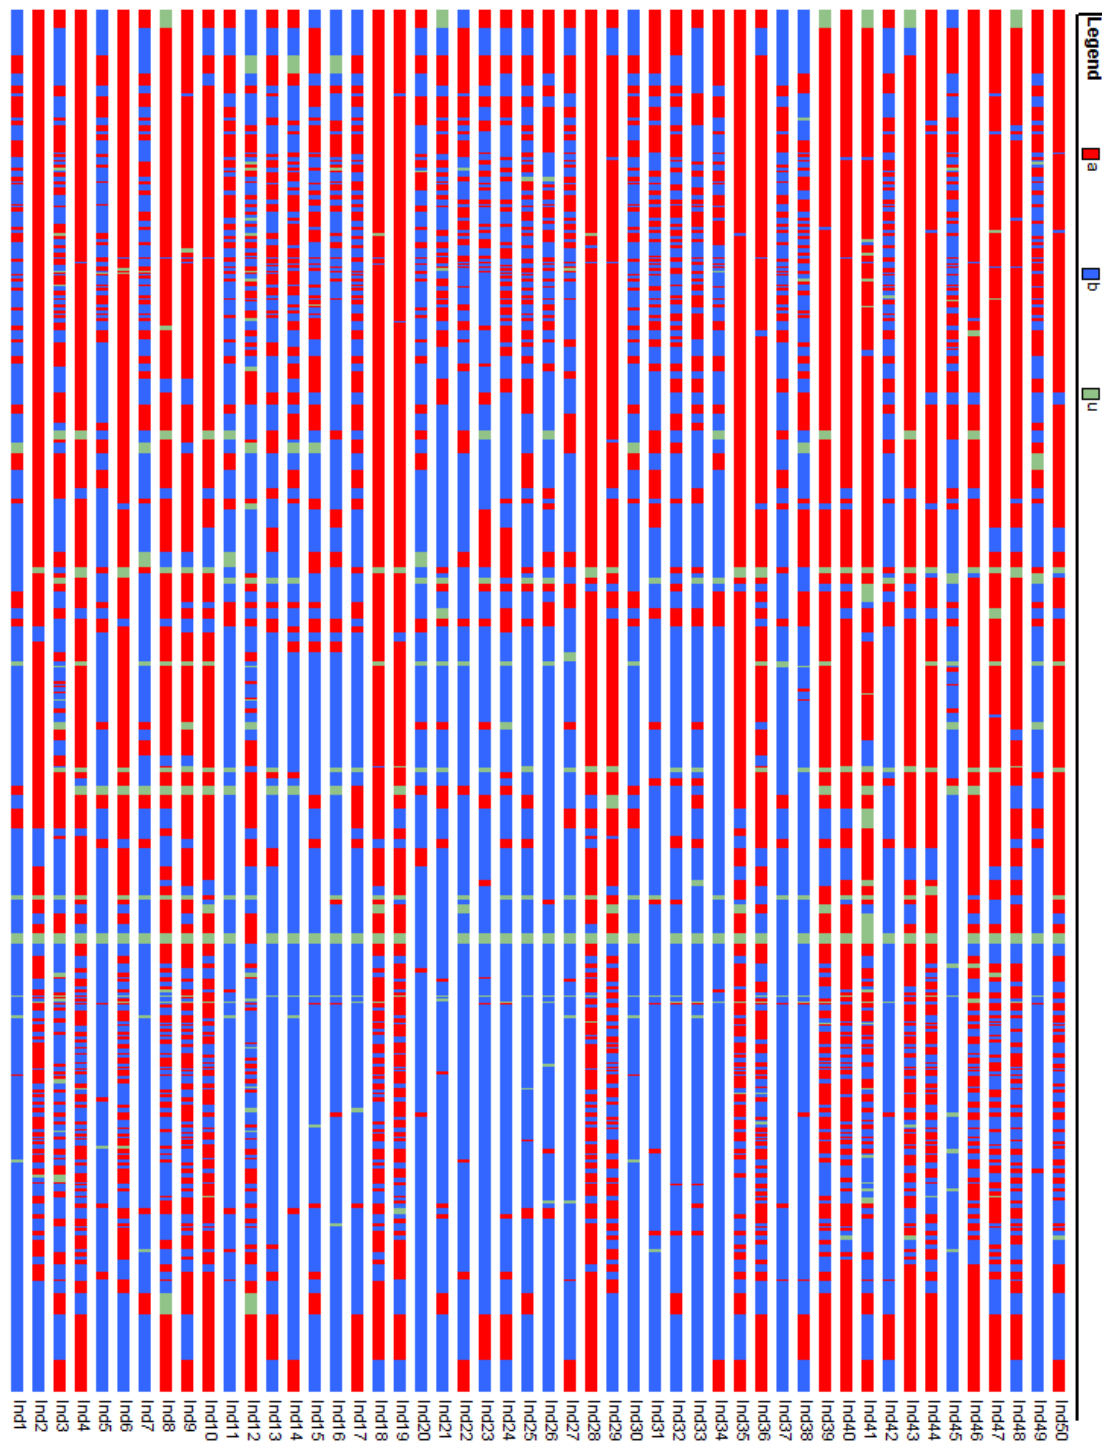

**Figure S1** Graphical genotypes of the largest linkage groups of the 'T17-349'-specific map constructed before disassembling the locus data. The linkage group consisted of a total of 296 loci. Graphical genotypes are shown for 50 of the 188  $F_1$  mapping population. Red and blue colors show the two haplotypes of 'T17-349'. Light green color shows missing data.

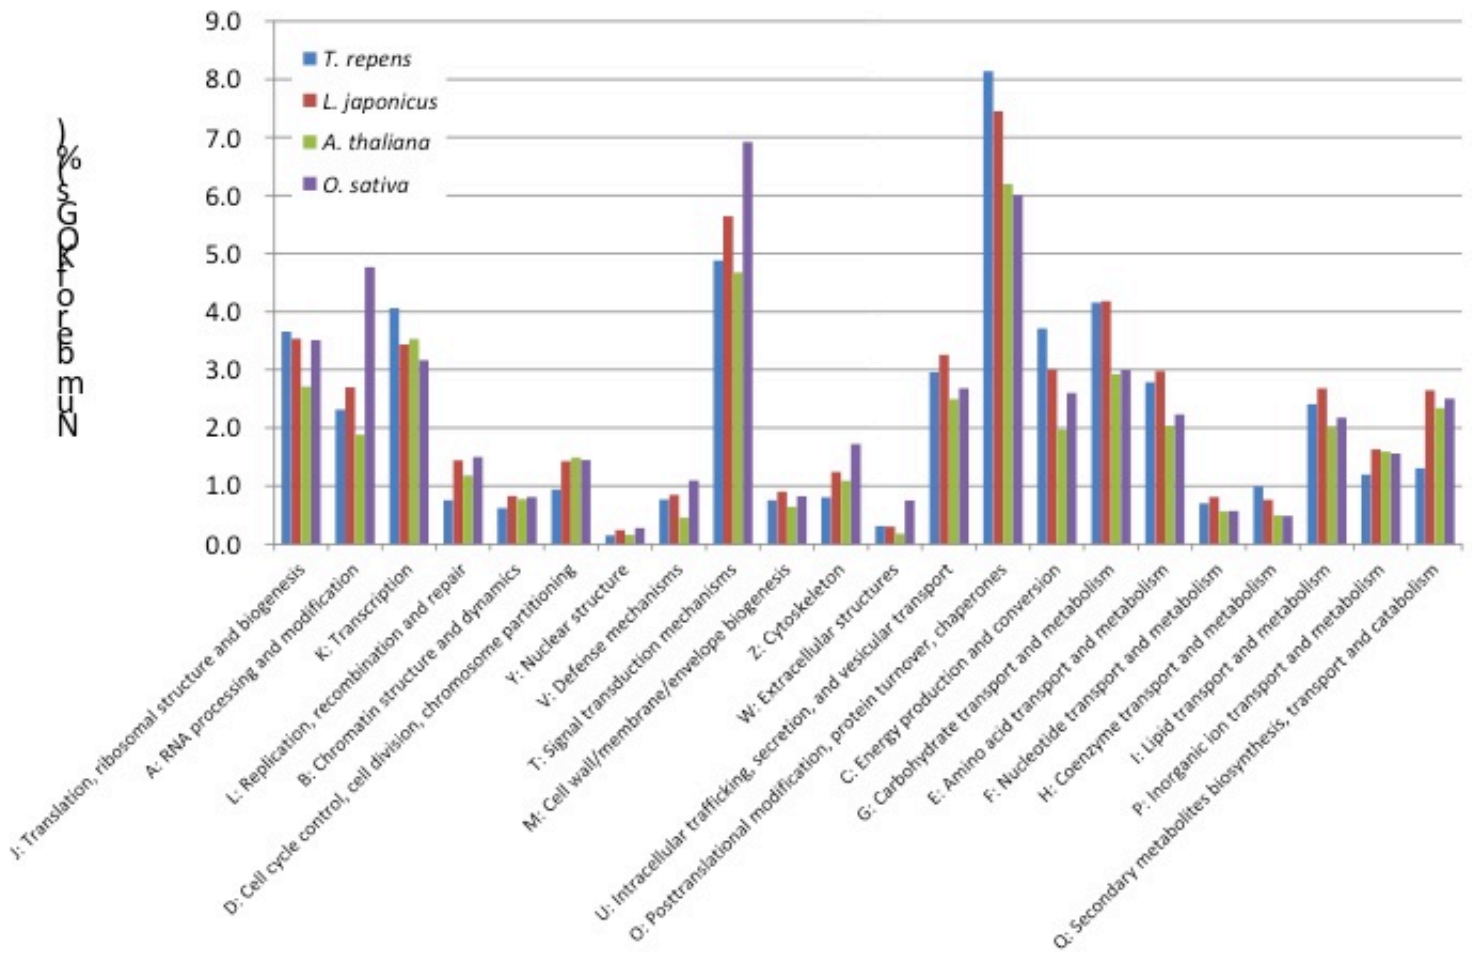

**Figure S2** Functional classification of non-redundant EST sequences of *T. repens* and unigene sequences of *L. japonicus*, *A. thaliana*, and *O. sativa* based on KOG categories. BLASTX was used to compare the non-redundant EST sequences with the sequences in the KOG database. EST sequences were then classified into the KOG categories with the most similar sequences. The total number of KOG associated ESTs sequences and non-associated were 5193 and 2789, respectively.

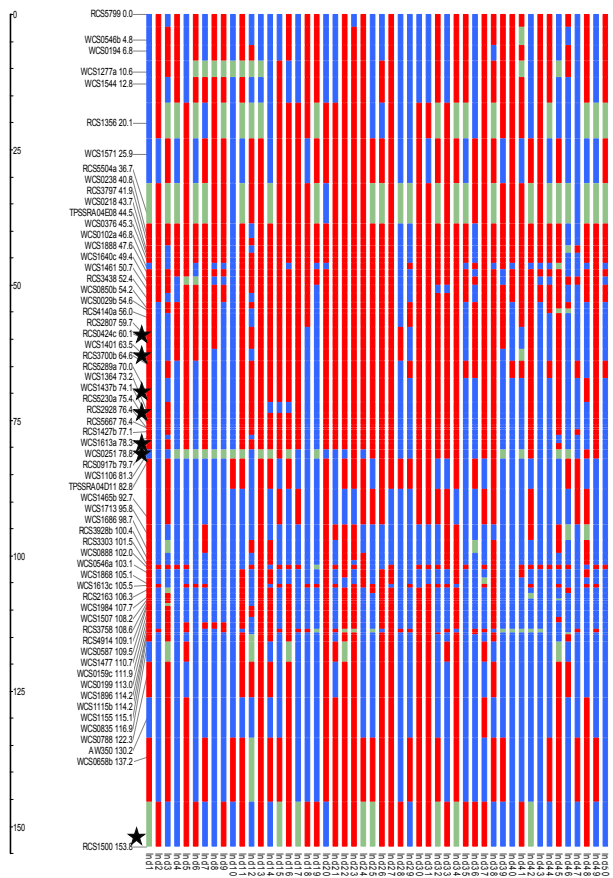

LG1a

cM

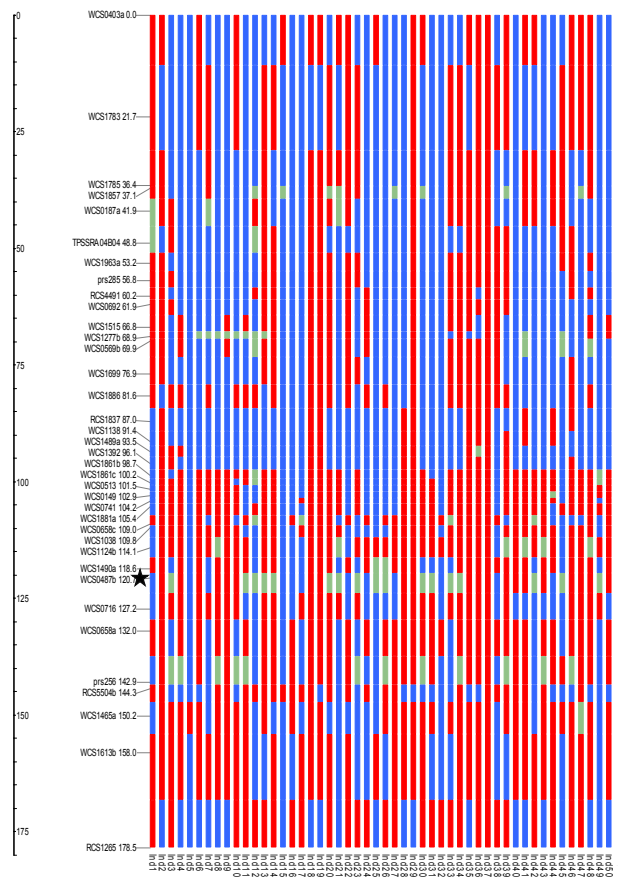

LG1b

cM

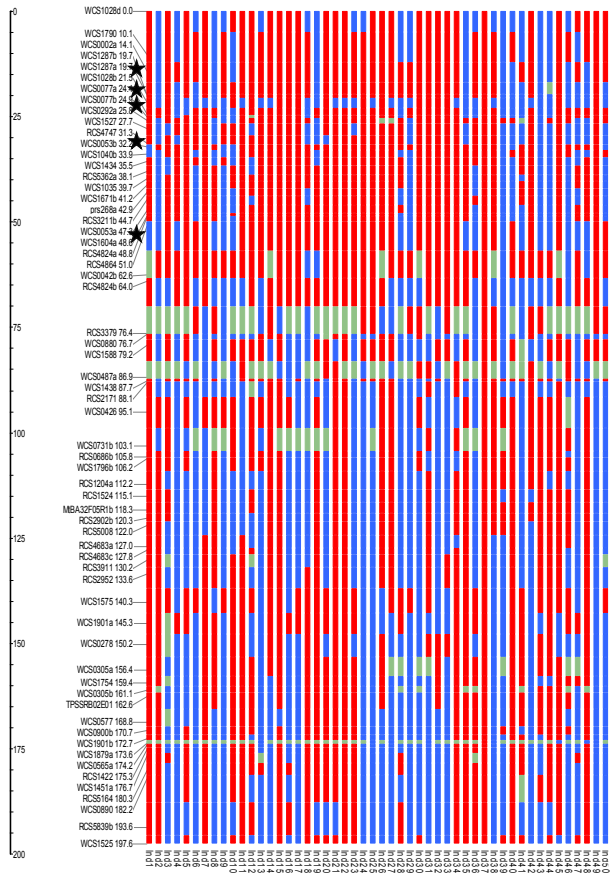

LG2a

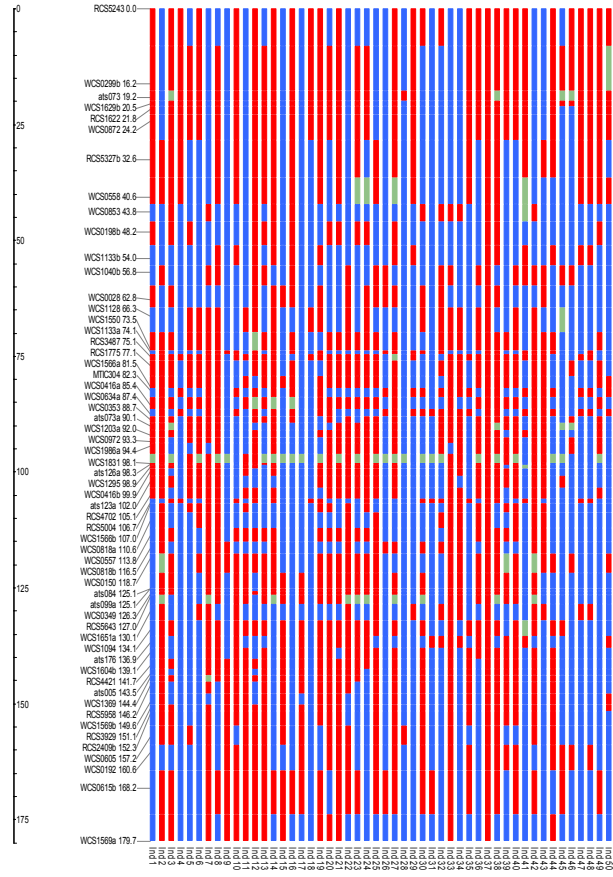

LG2b

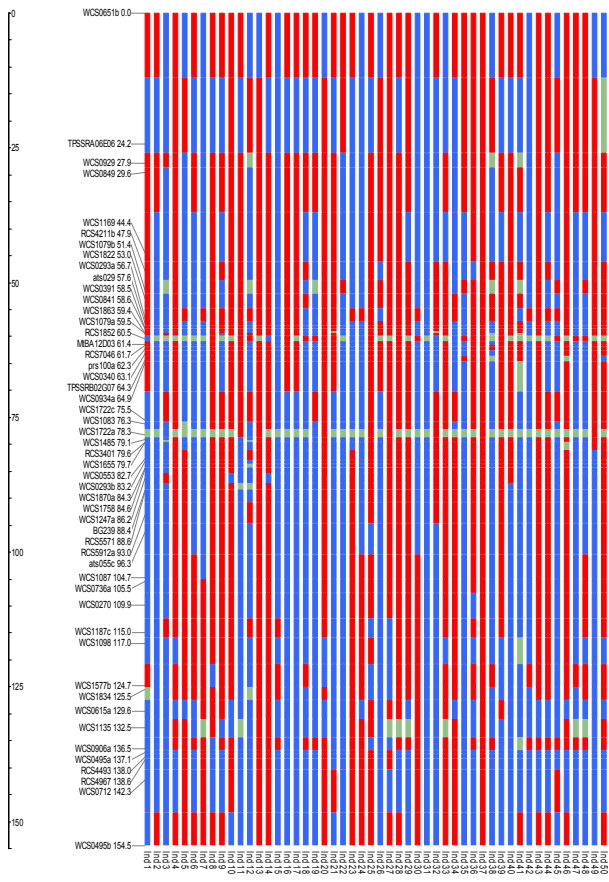

LG3a

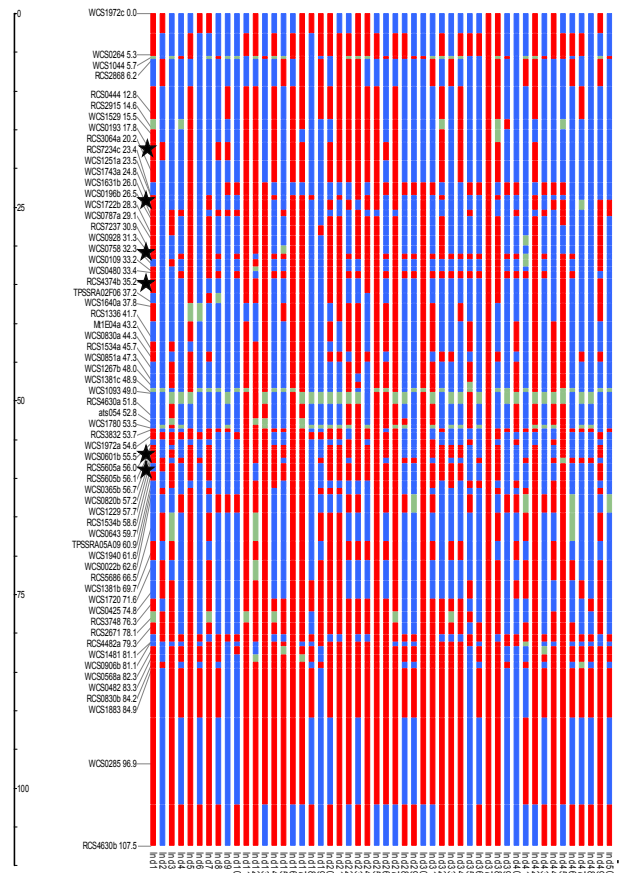

LG3b

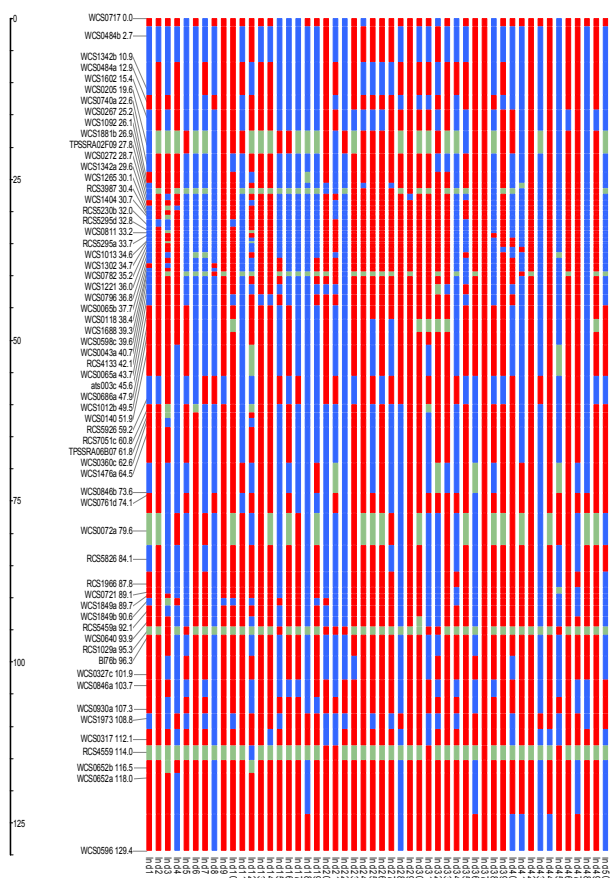

LG4a

cM

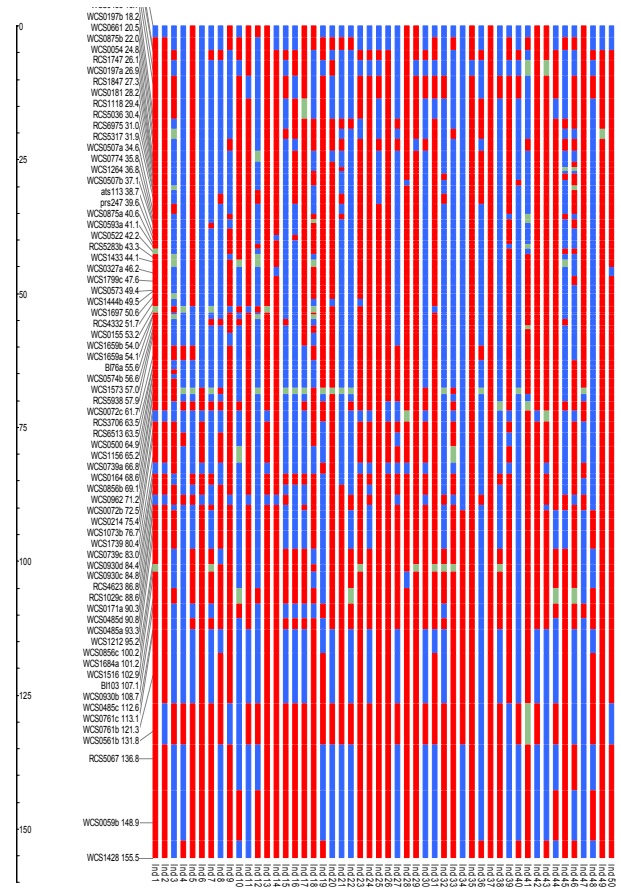

LG4b

cM

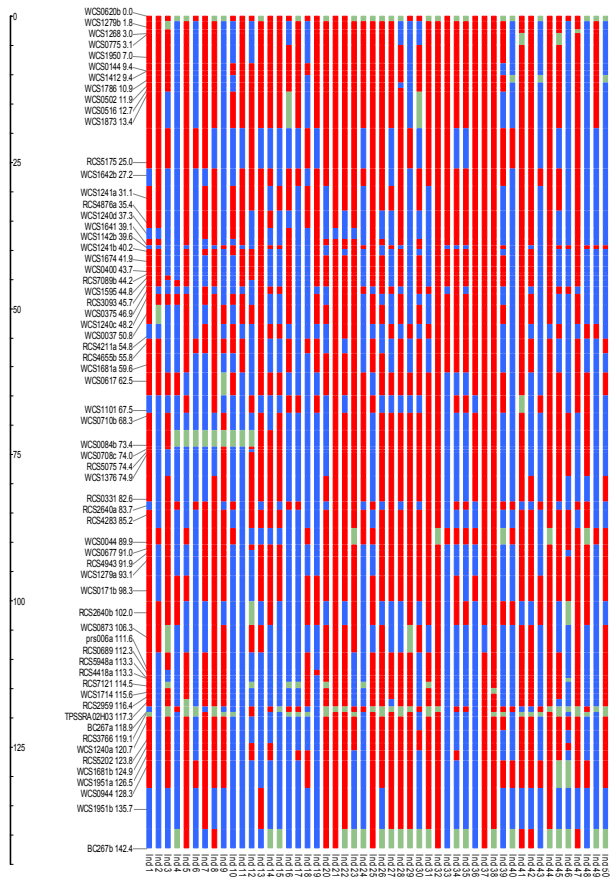

LG5a

cM

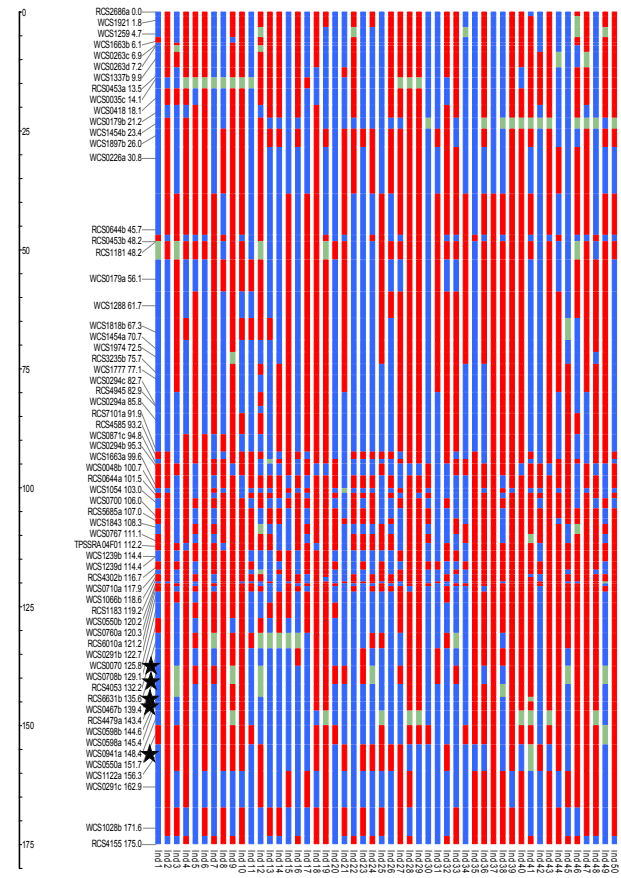

LG5b

cM

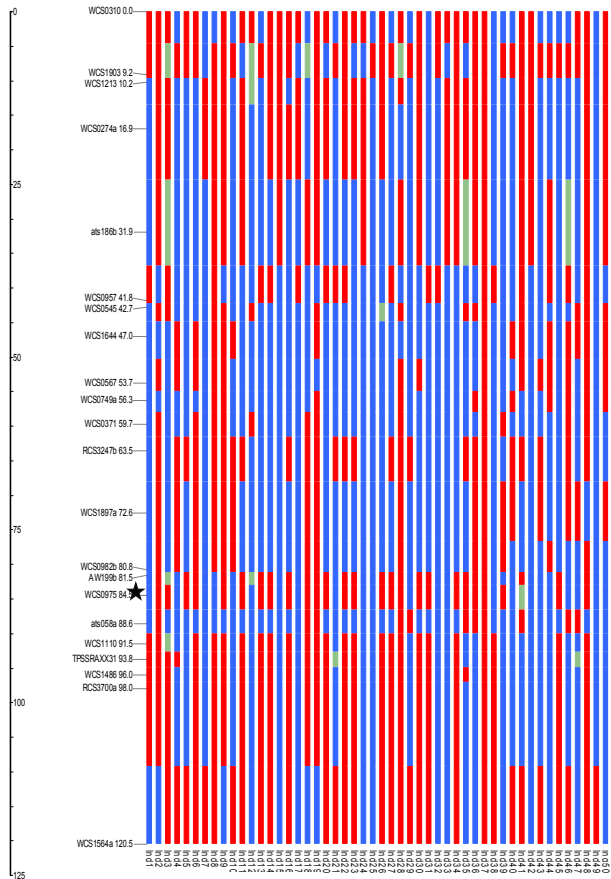

LG6a

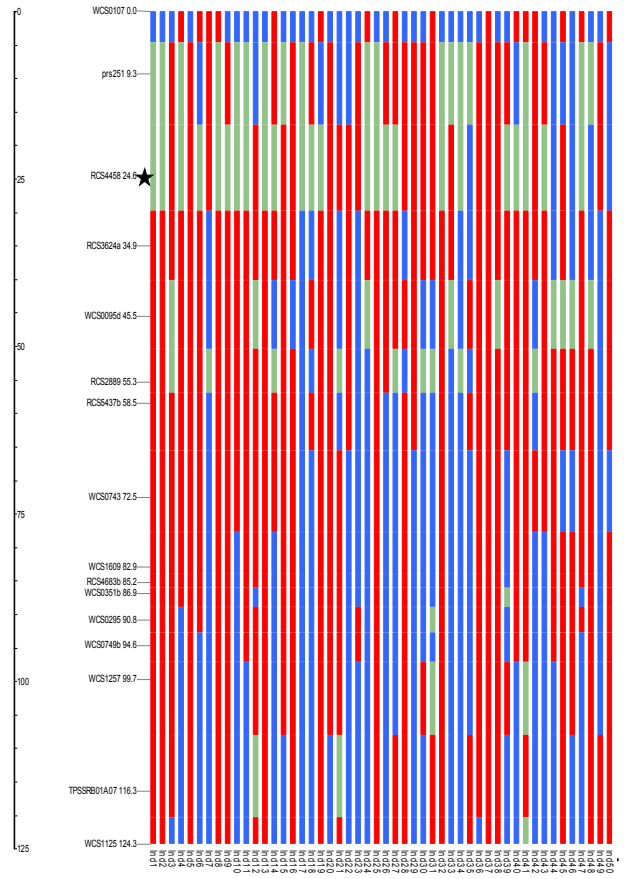

LG6b



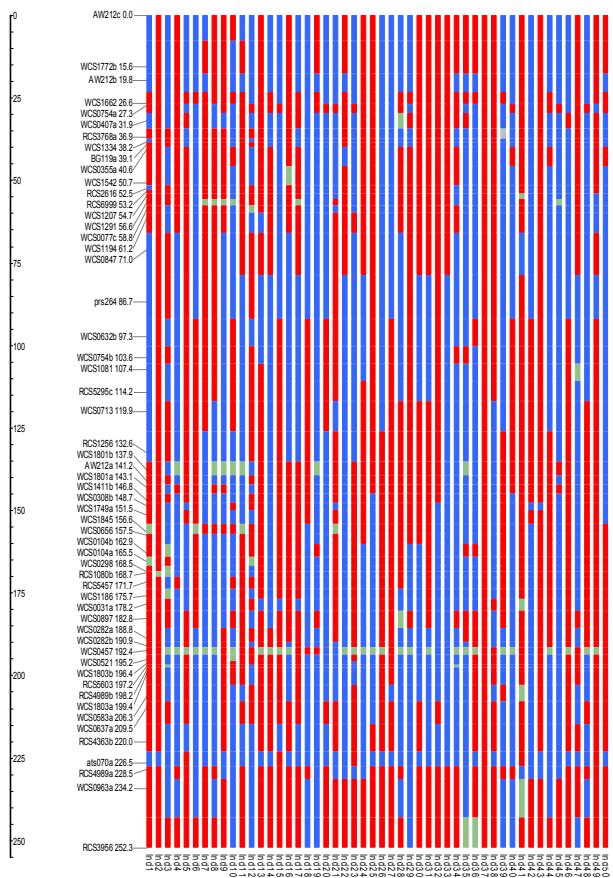

LG7a

cM

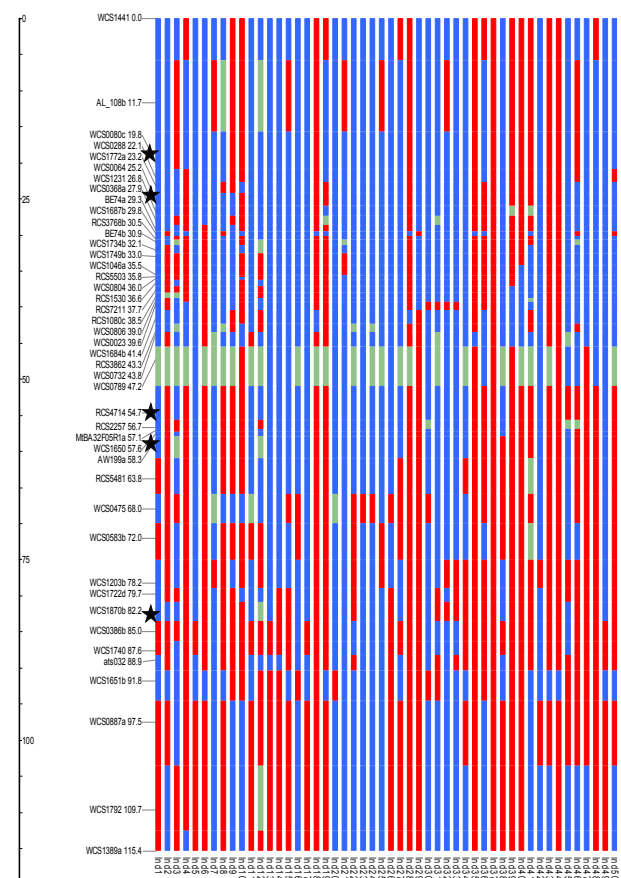

LG7b

cM

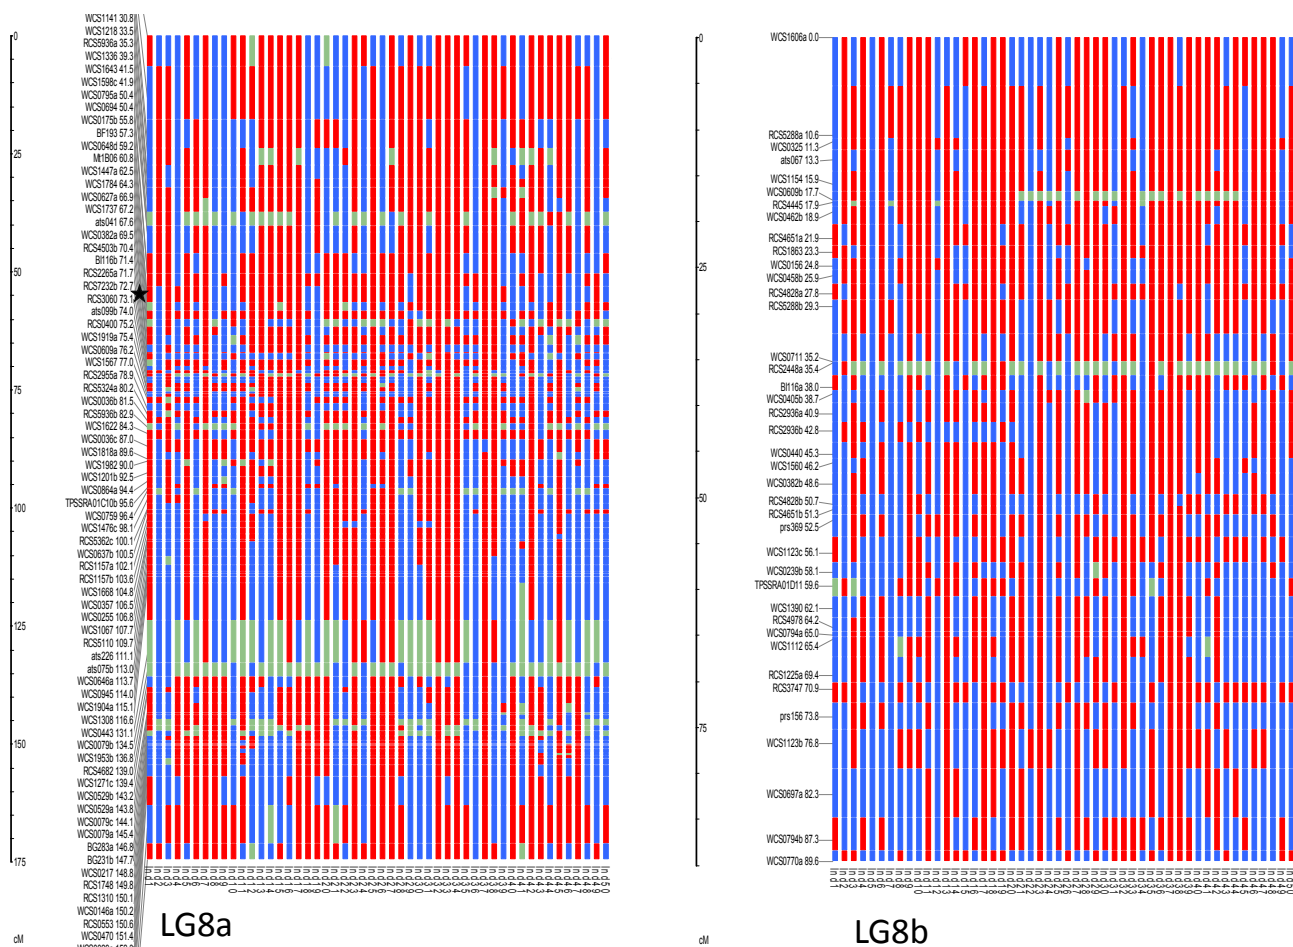

**Figure S3** Graphical genotypes of 50 of the 188 F<sub>1</sub> populations mapped onto the largest linkage group shown in Figure S1. The red and blue colors show the two haplotypes of 'T17-349'. The light green color shows missing data. Black stars indicate loci showing a high LD ( $r^2 > 0.5$ ) between loci mapped onto different linkage groups.

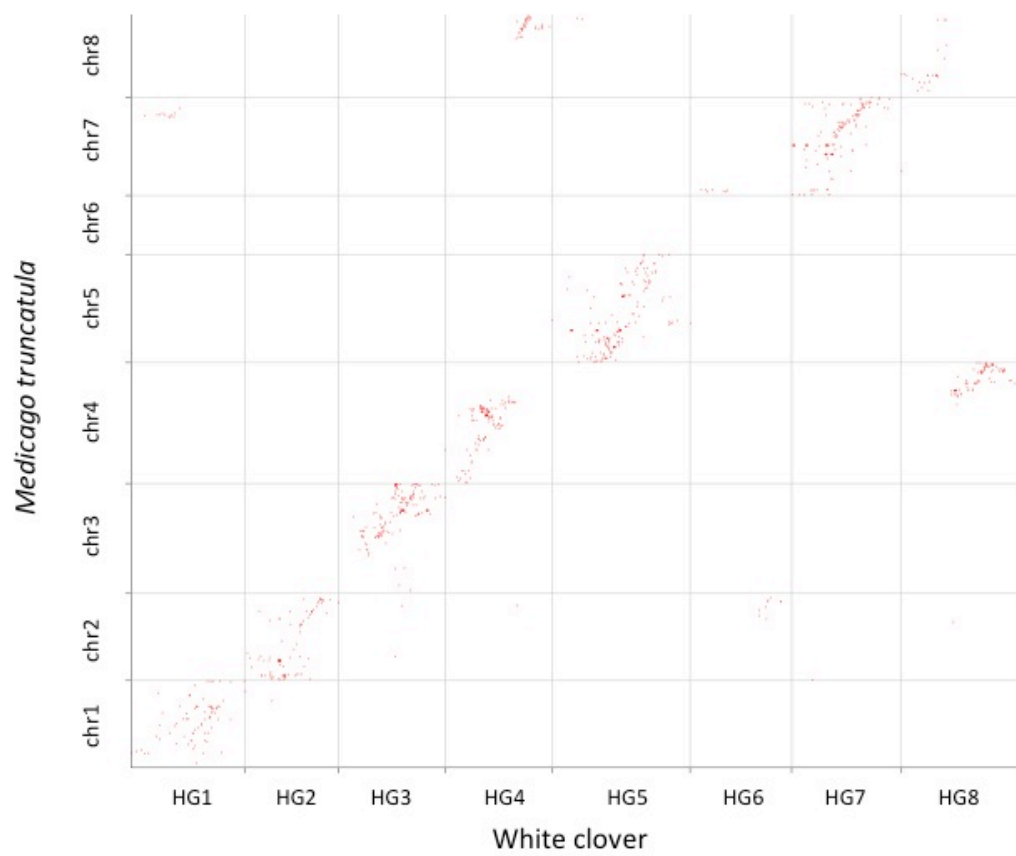

**Figure S4** Graphical view of syntenic blocks between white clover and *M. truncatula*. X and Y axis show position on mapped markers on an white clover linkage map and chromosomes of *M. truncatula* genome, respectively.

List of loci identified LD showing  $r^2 > 0.5$  between loci mapped onto different linkage groups.

| Mapped LG | Locus name | Mapped LG | Locus name |
|-----------|------------|-----------|------------|
| 1a        | RCS1500    | 3b        | WCS0643    |
| 1a        | RCS2807    | 3b        | WCS1743a   |
| 1a        | RCS5289a   | 5b        | RCS6631b   |
| 1a        | WCS0251    | 5b        | WCS0467b   |
| 1a        | WCS1106    | 5b        | WCS0598a   |
| 1a        | WCS1364    | 5b        | WCS0598b   |
| 1a        | WCS1401    | 5b        | WCS1122a   |
| 1b        | WCS0487b   | 6a        | WCS0975    |
| 2a        | RCS4747    | 6b        | RCS4458    |
| 2a        | RCS4864    | 7b        | ats032     |
| 2a        | WCS0002a   | 7b        | AW199a     |
| 2a        | WCS0077a   | 7b        | RCS4714    |
| 2a        | WCS1287b   | 7b        | WCS0064    |
| 3b        | RCS3064a   | 7b        | WCS0080c   |
| 3b        | RCS4374b   | 7b        | WCS1870b   |
| 3b        | RCS5605a   | 8a        | WCS0175b   |
| 3b        | RCS7237    |           |            |

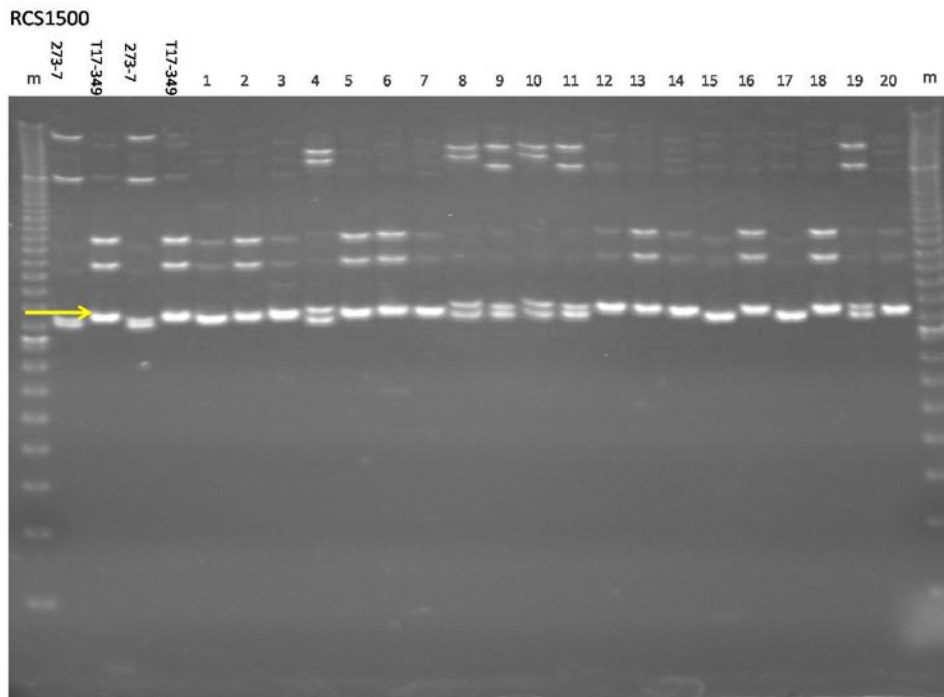

RCS2807

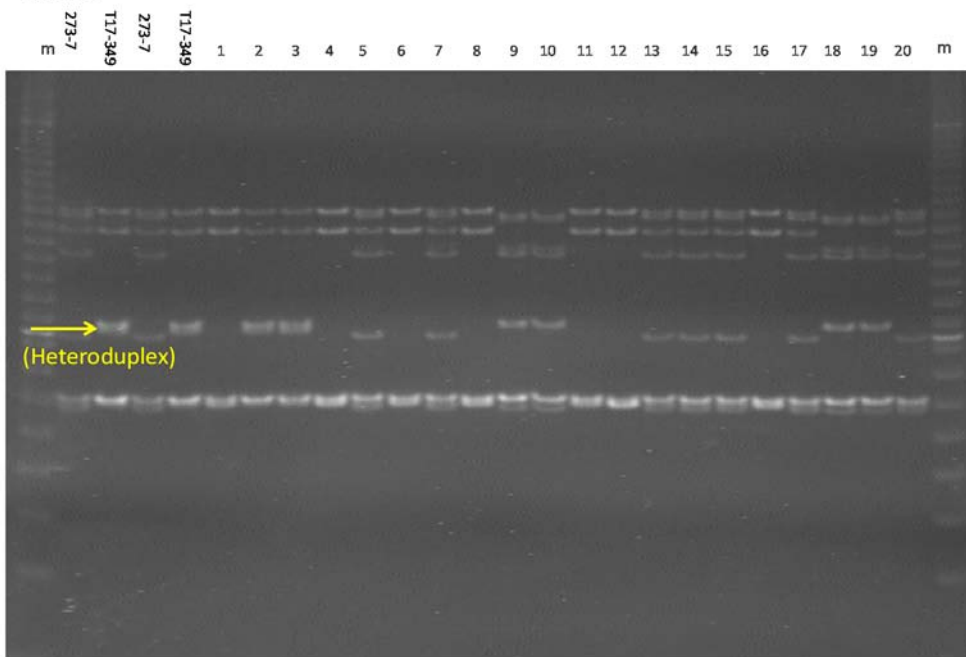

RCS5289a

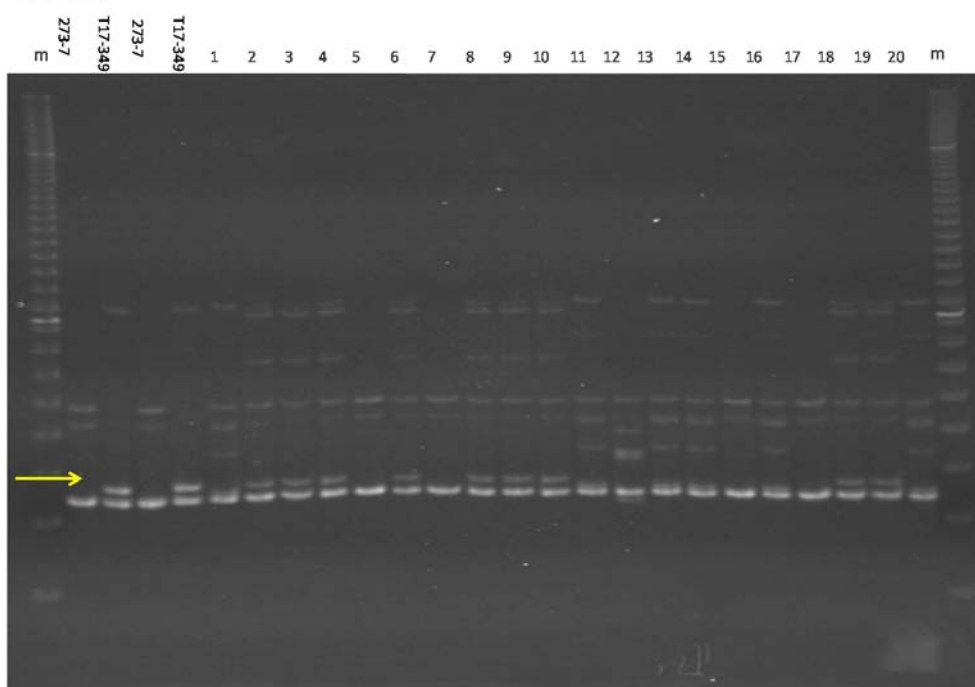

WCS0251

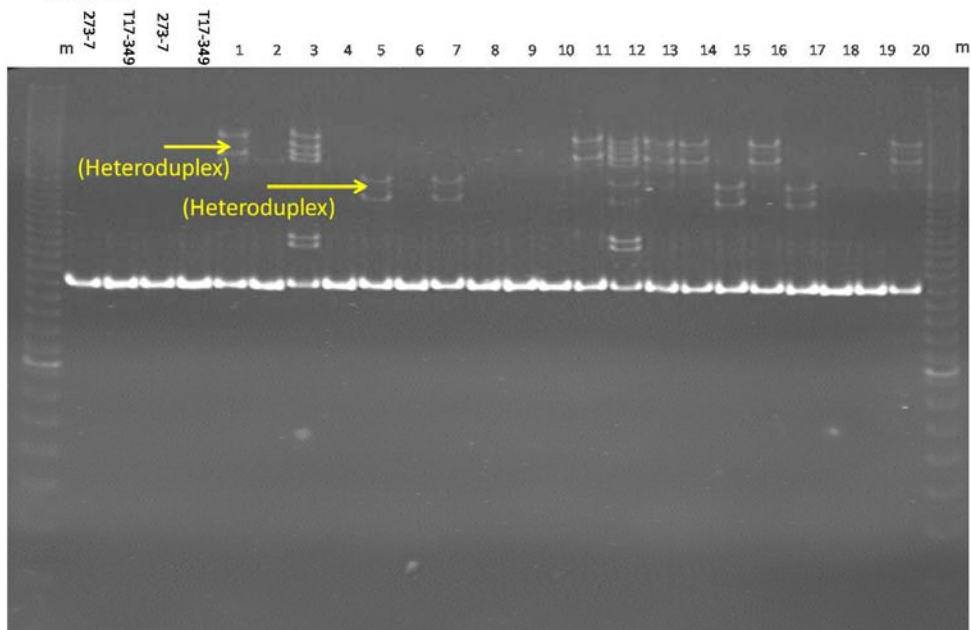

WCS1106

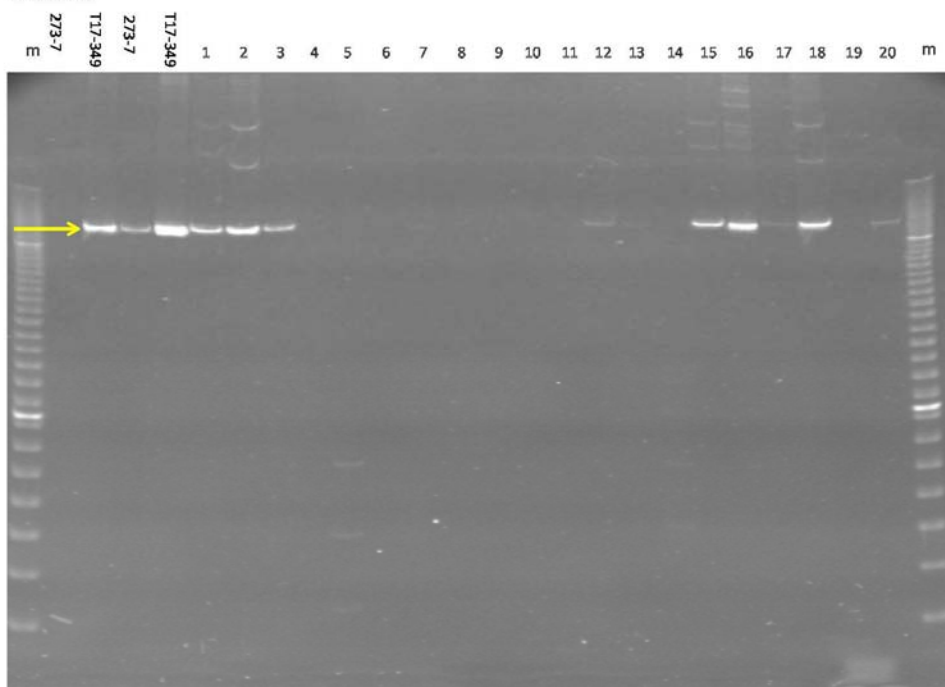

WCS1364

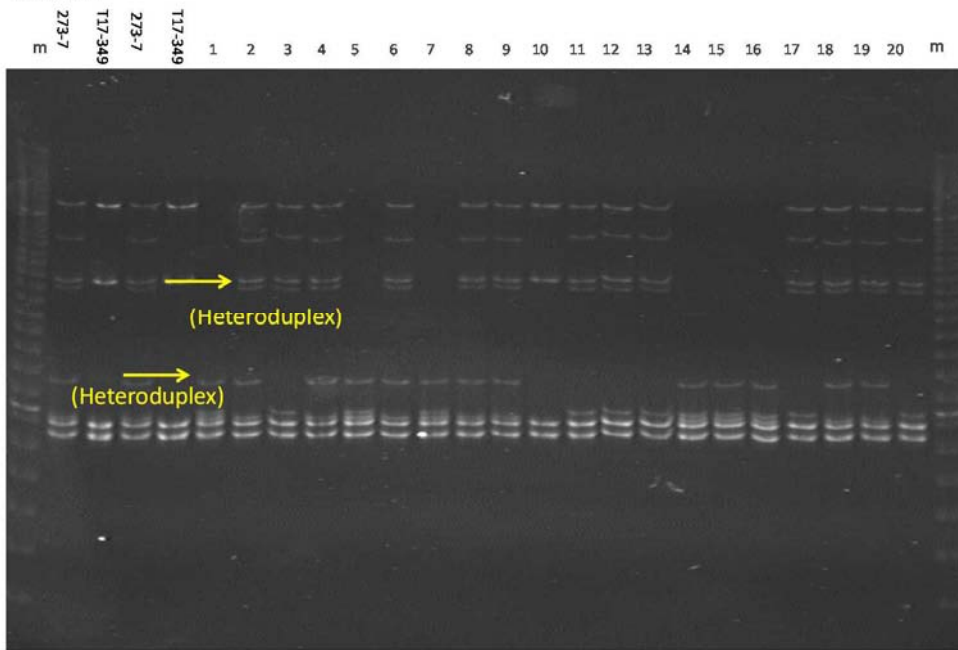

WCS1401

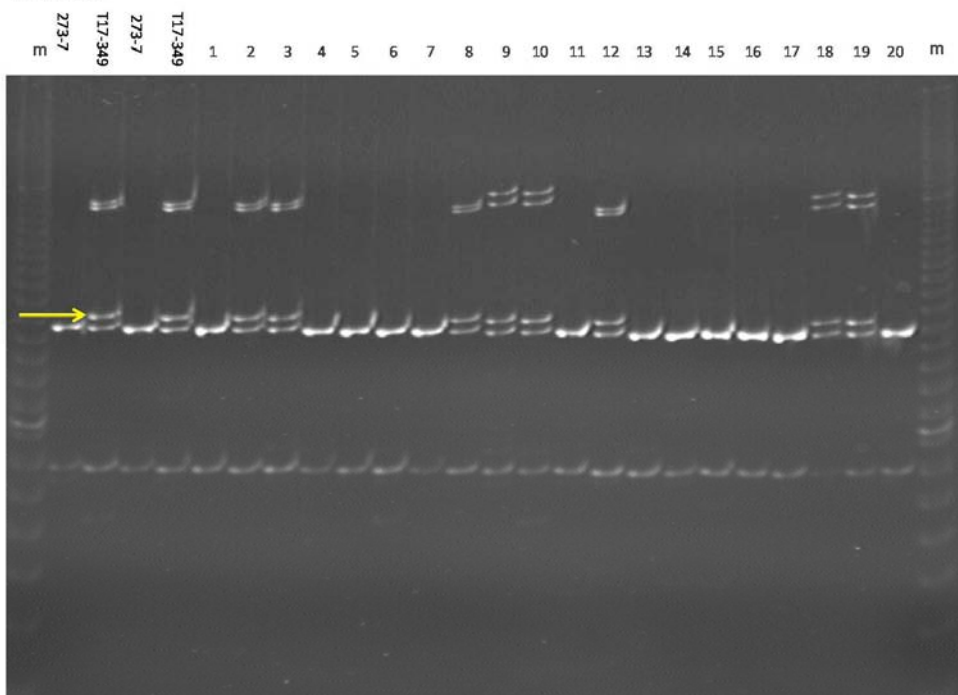

WCS0487b

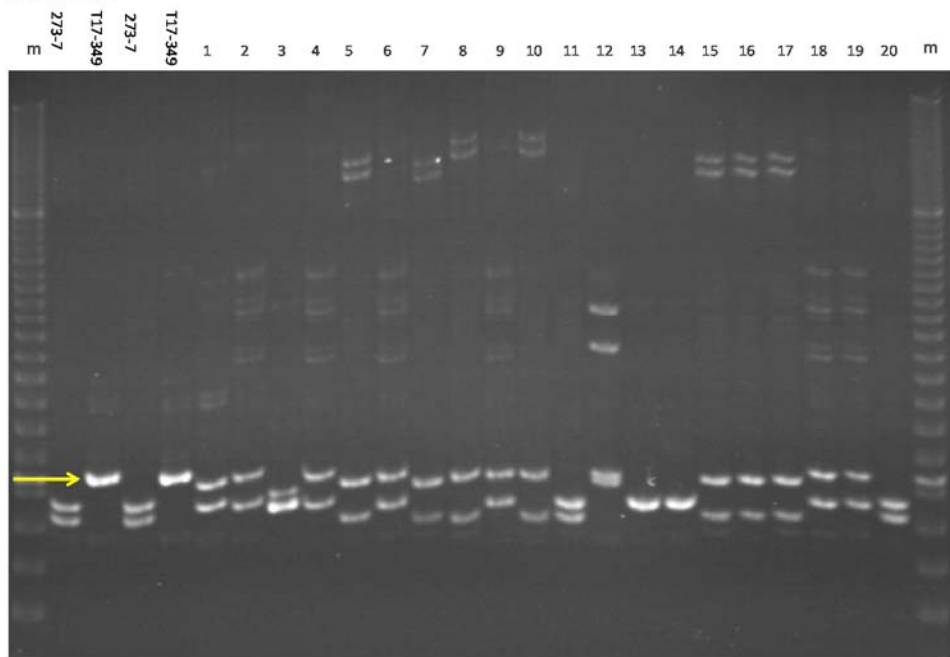

RCS4747

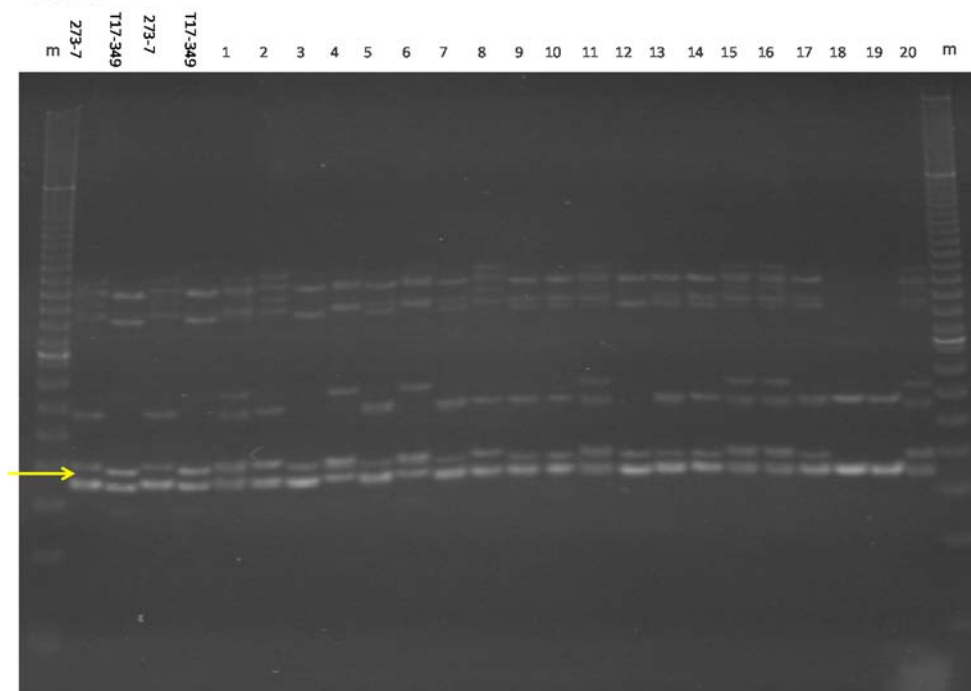



RCS4864

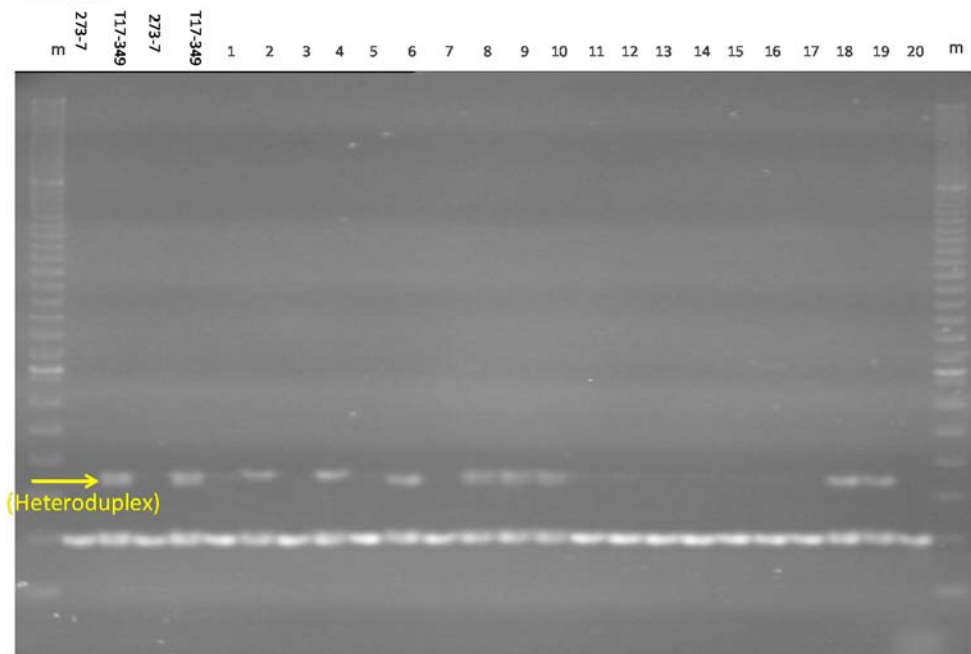

WCS0002a

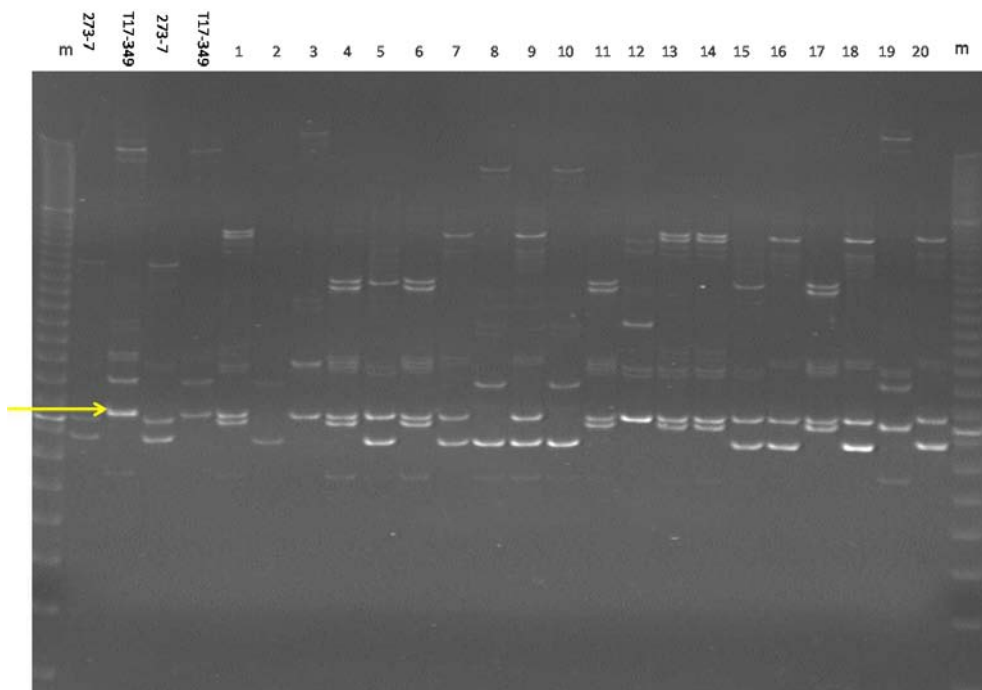

WCS00077a

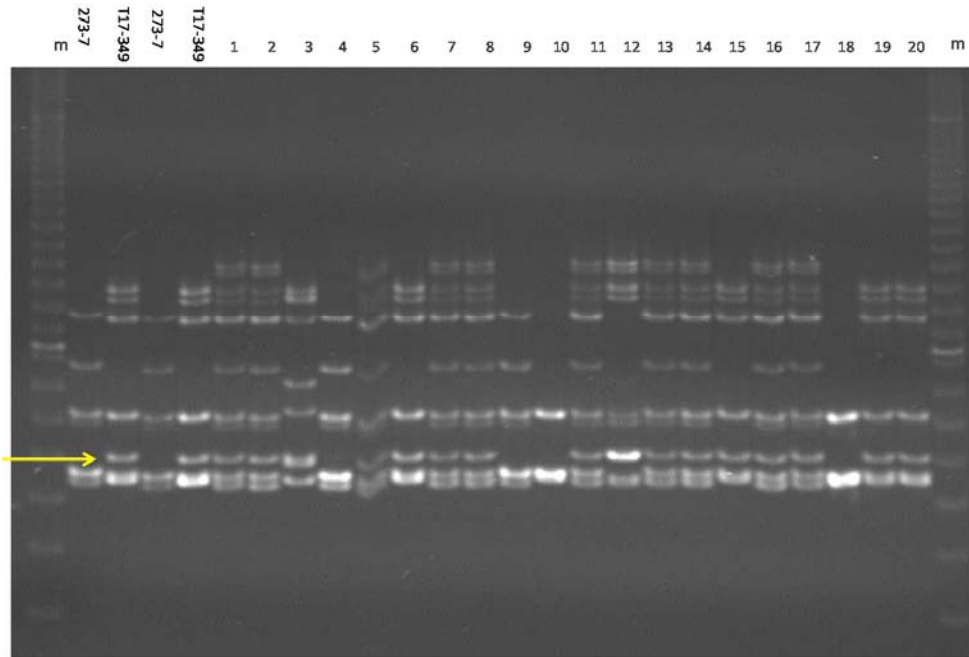

WCS1287b

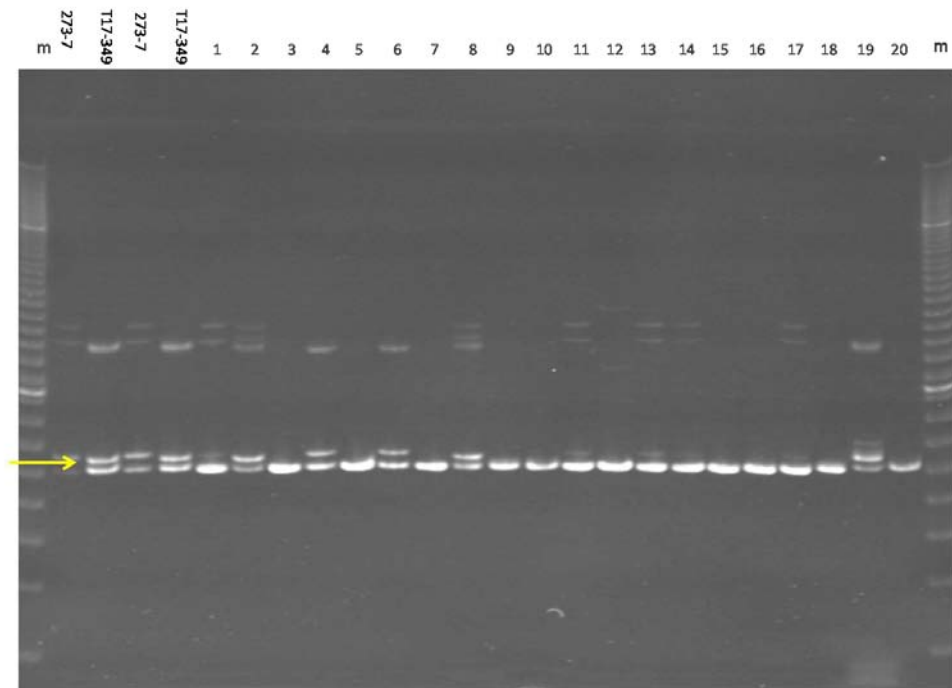

RCS3064a

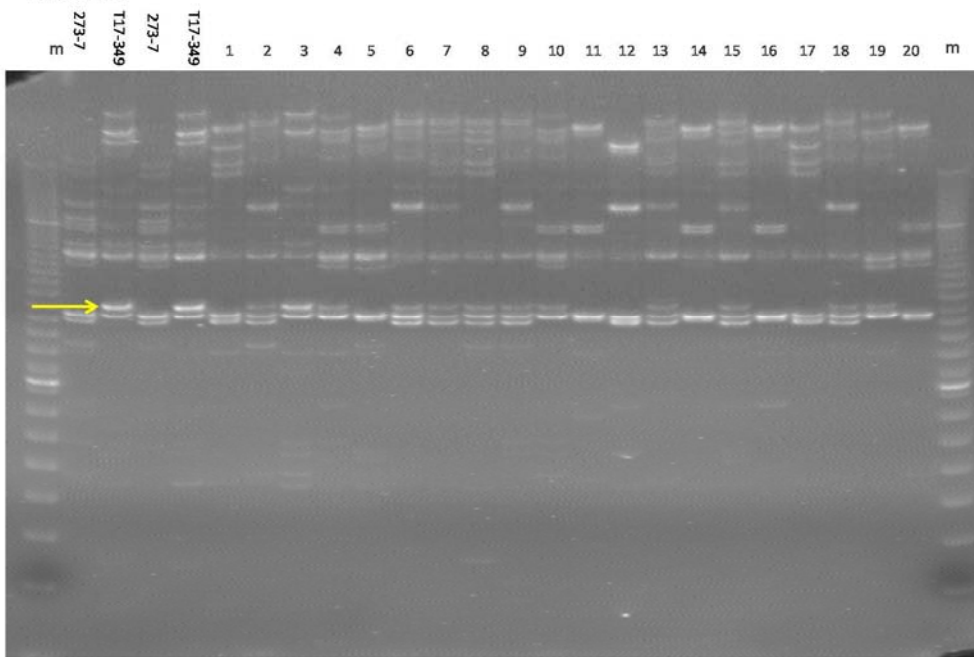

RCS4374b

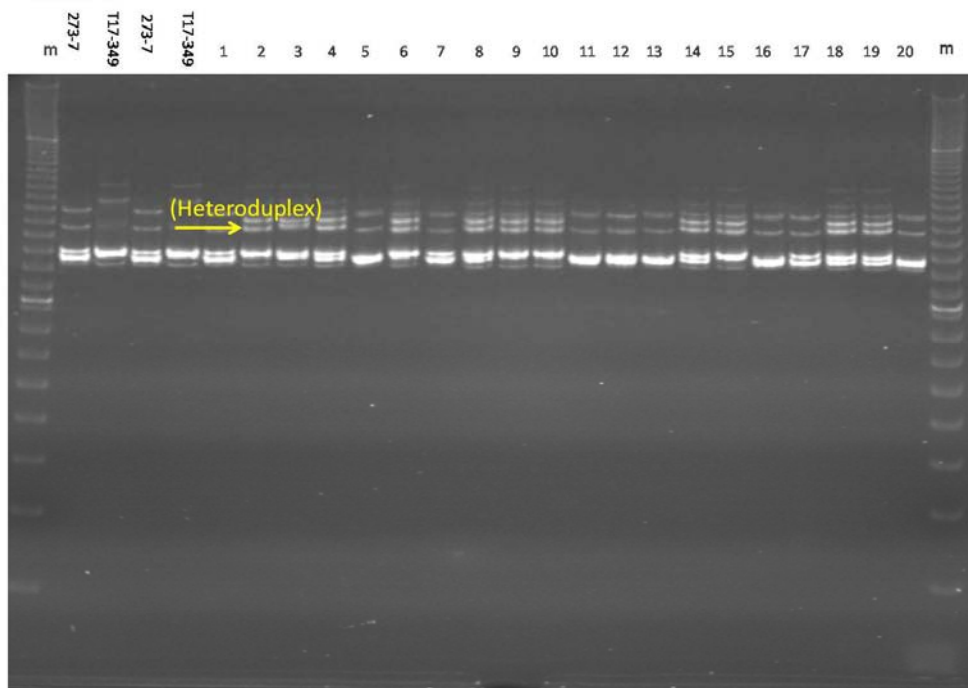

RCS5605a

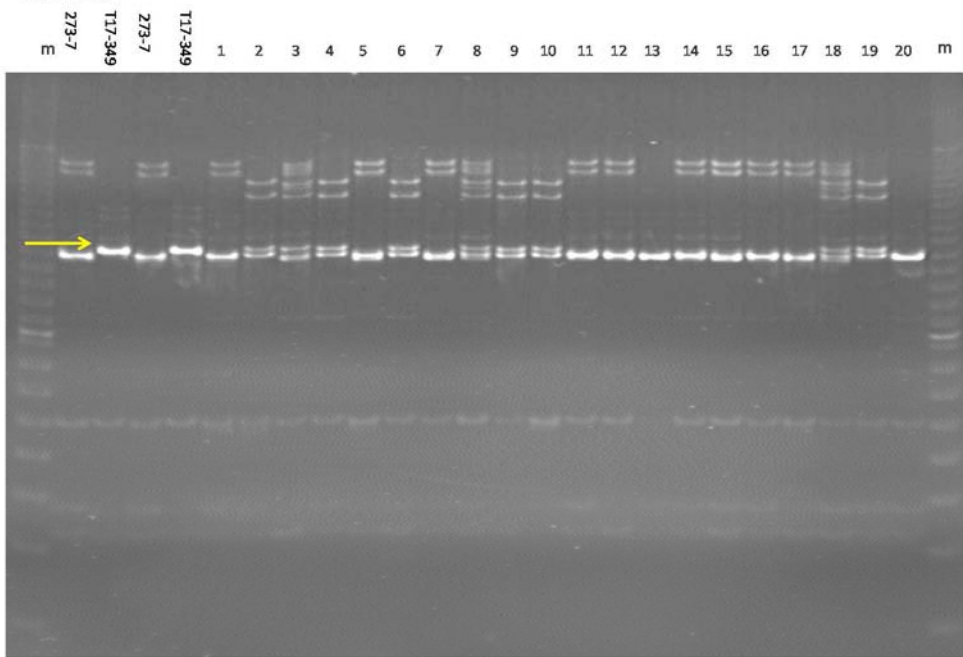

RCS7237

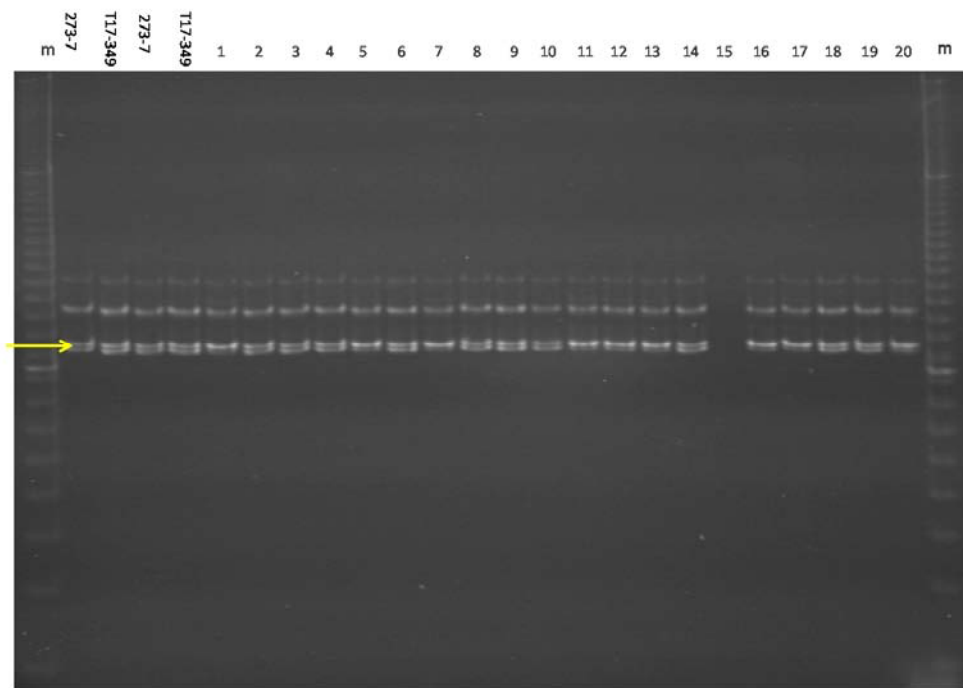

WCS0643

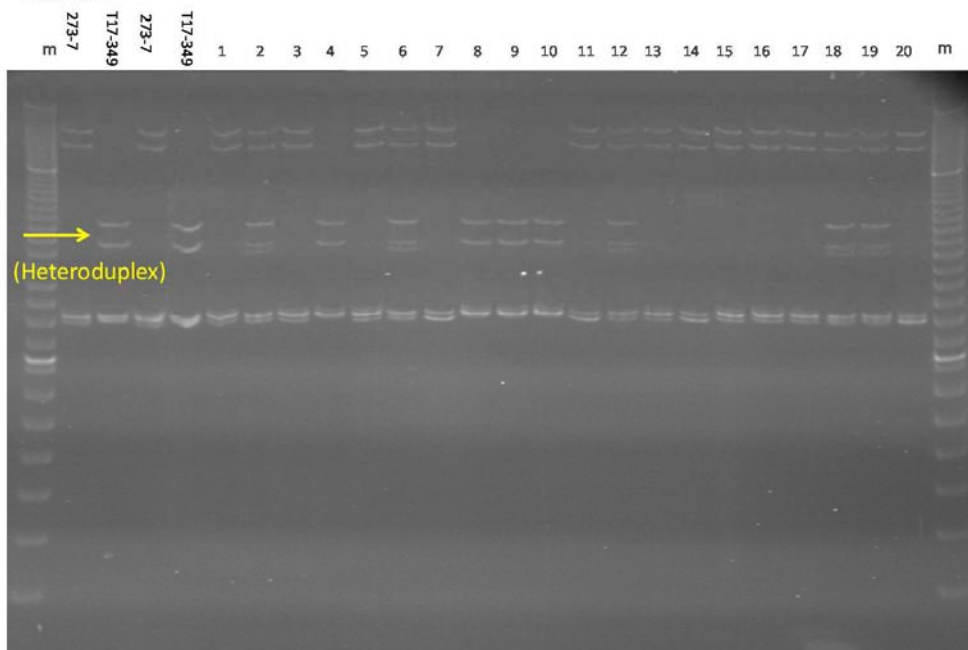

WCS1743a

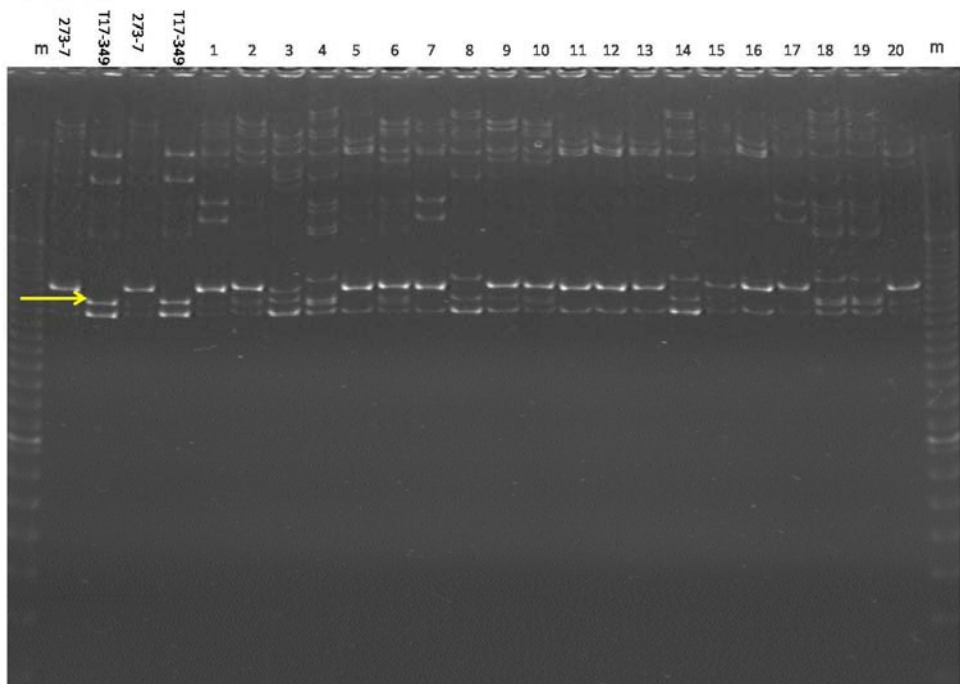

RCS6631b

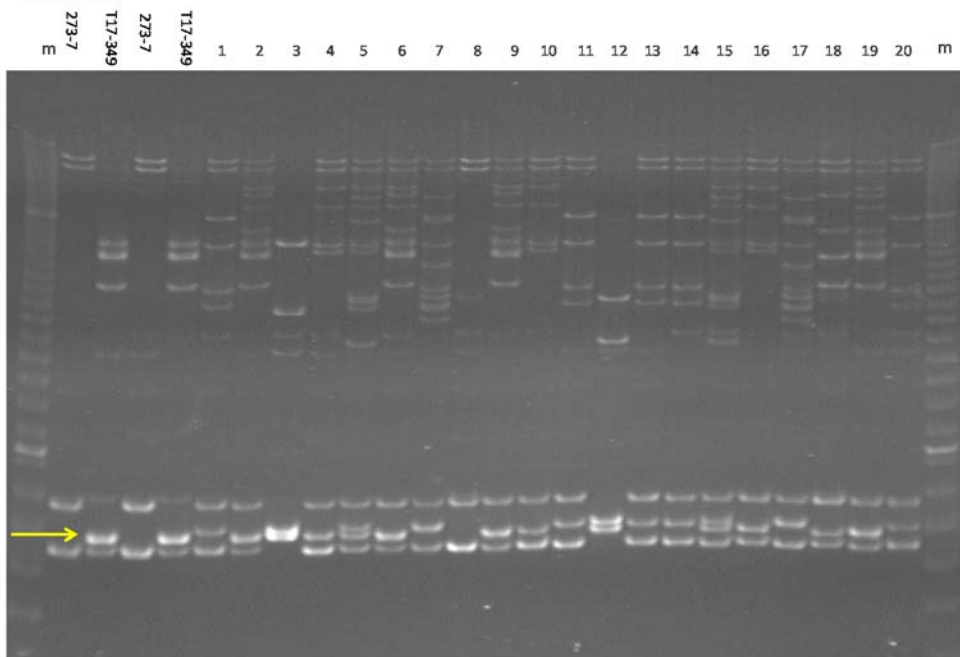

WCS0467b

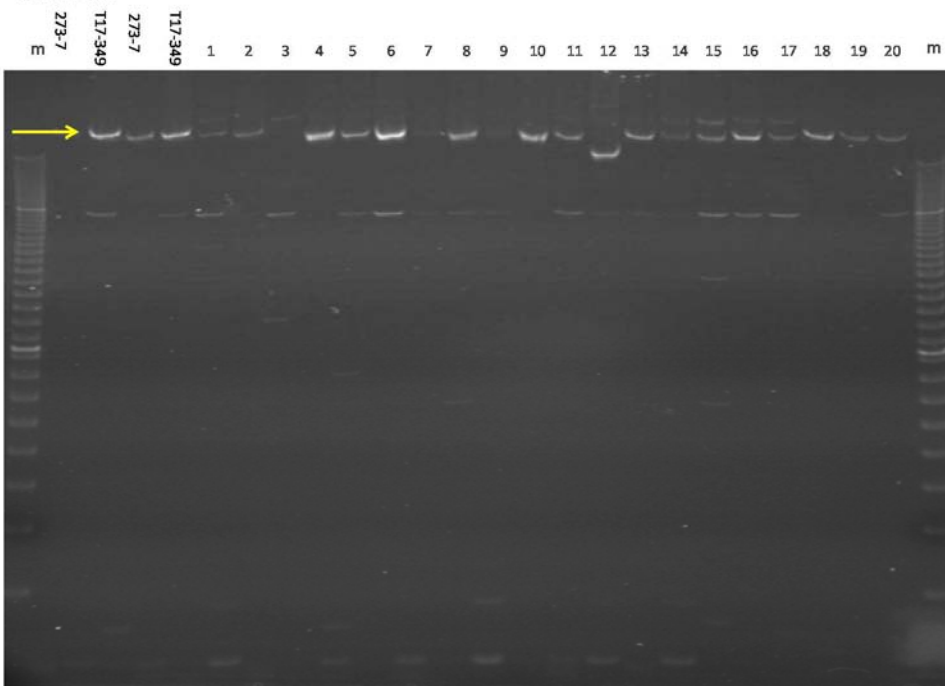

WCS0598a and WCS0598b

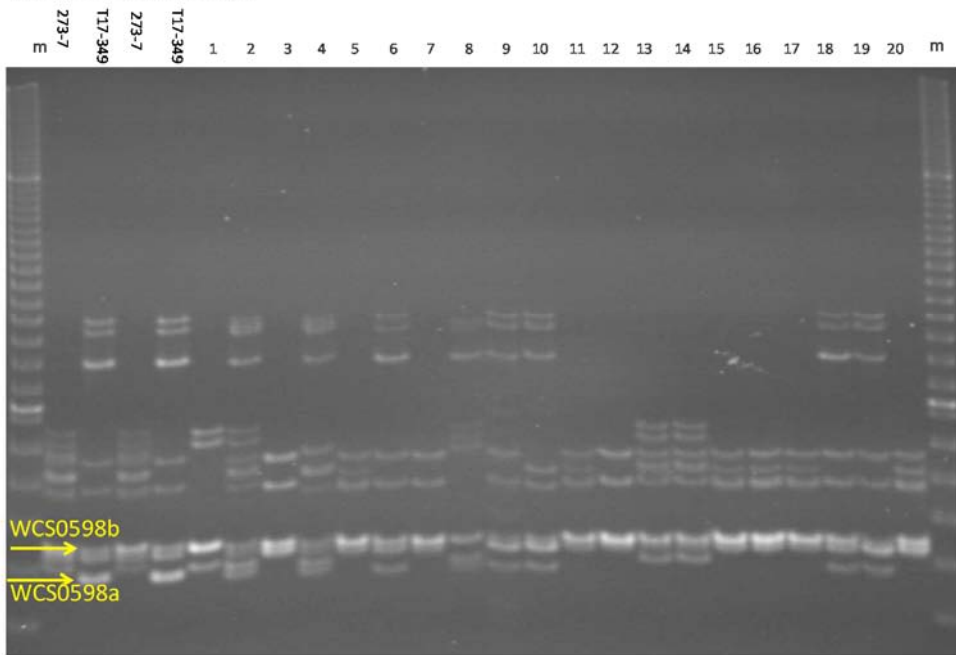

WCS1122a

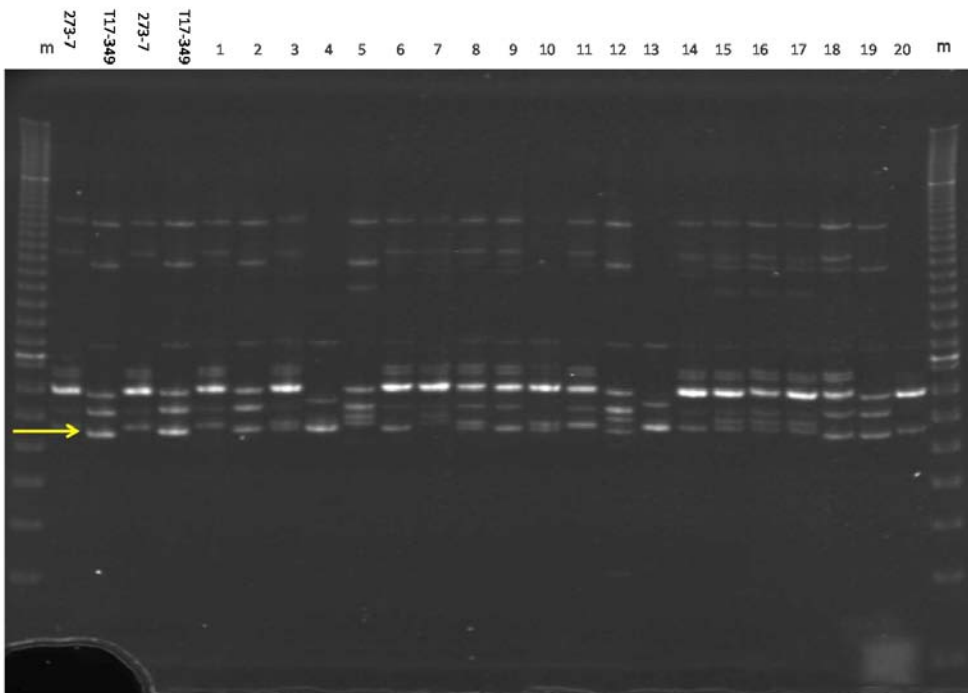

WCS0975

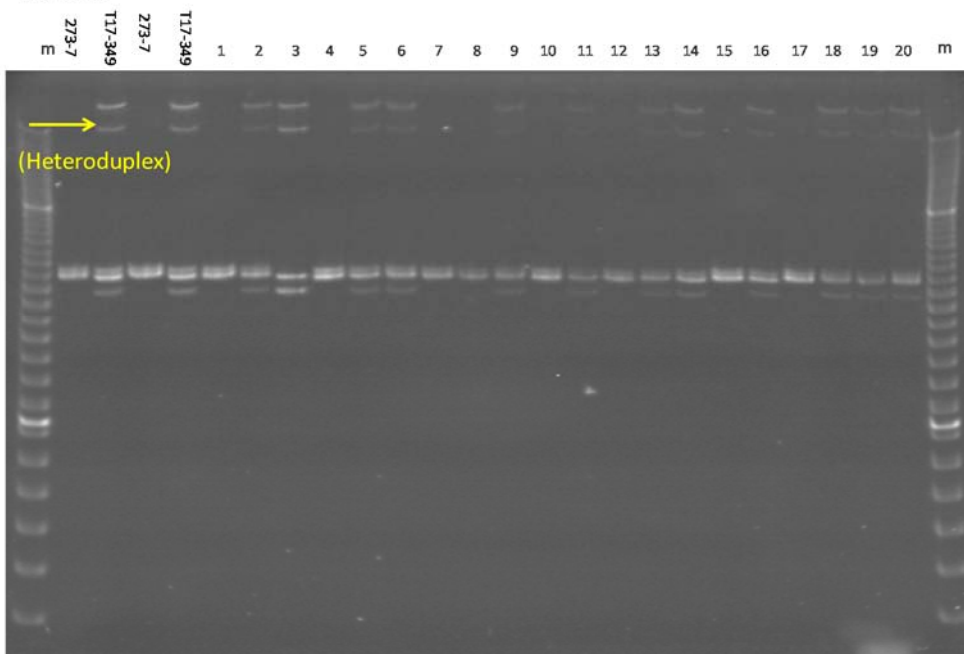

RCS4458

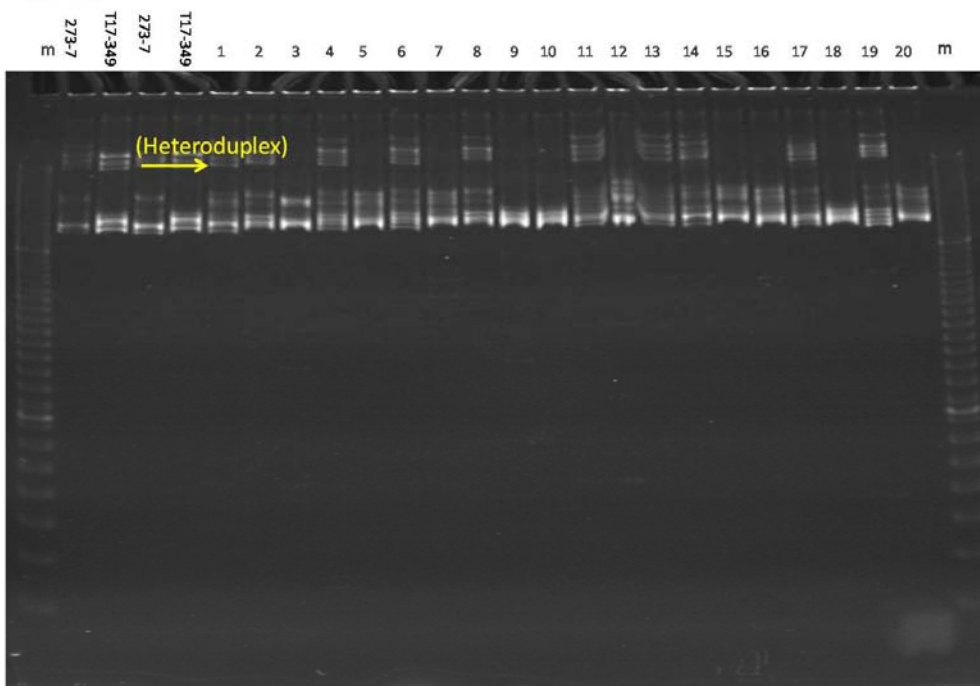



ats032

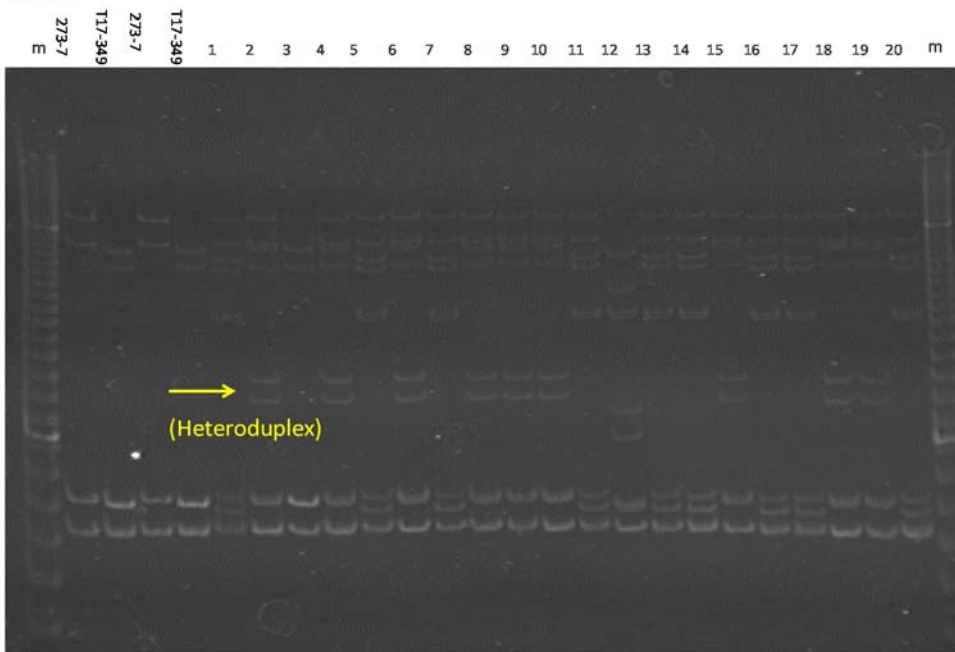

AW199a

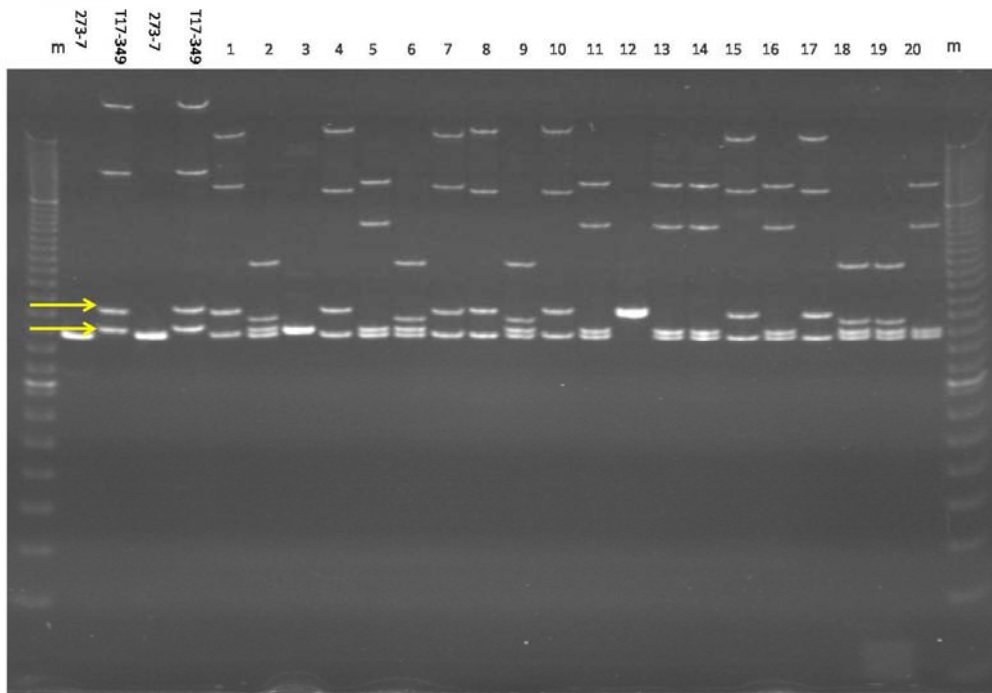

RCS4714

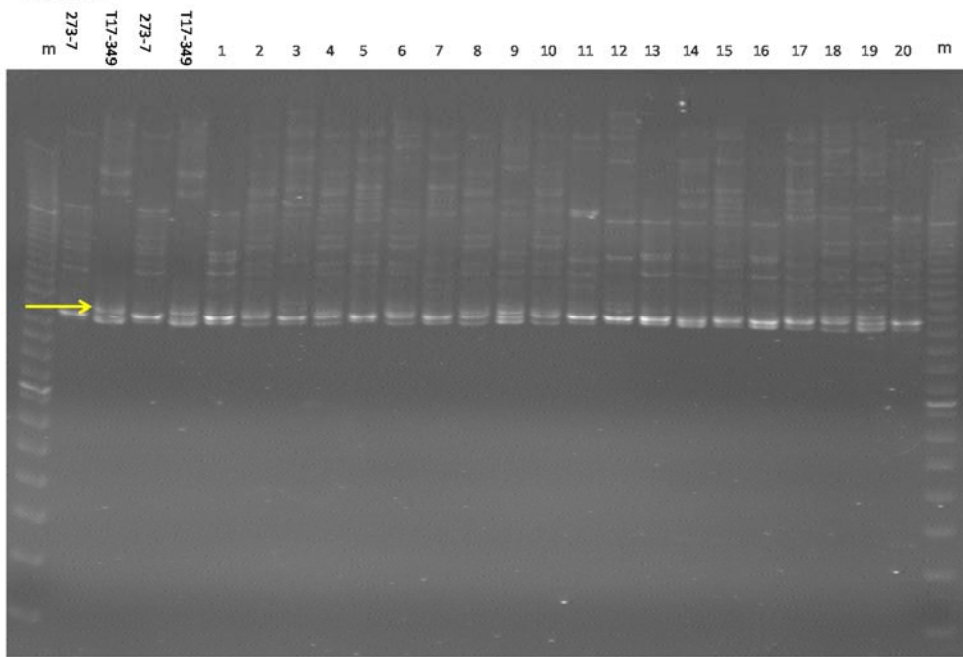

WCS0064

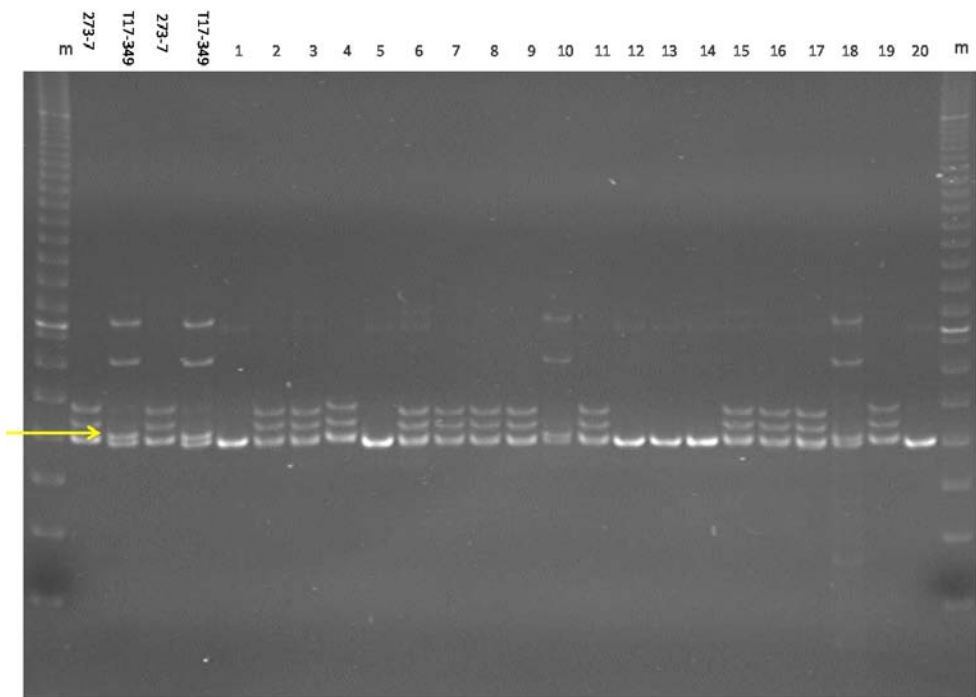

WCS0080c

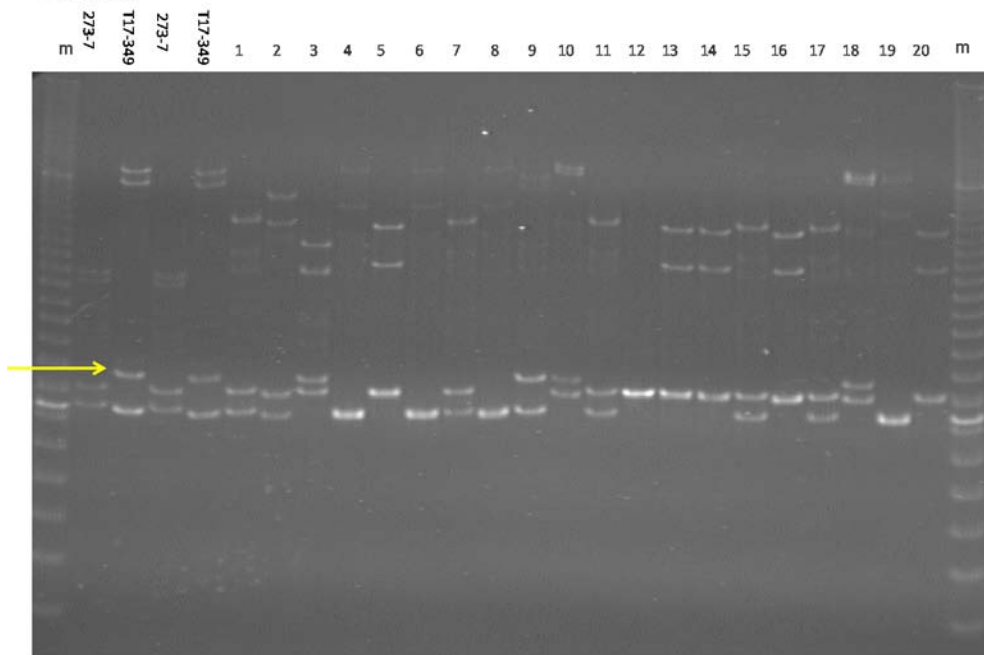

WCS1870b

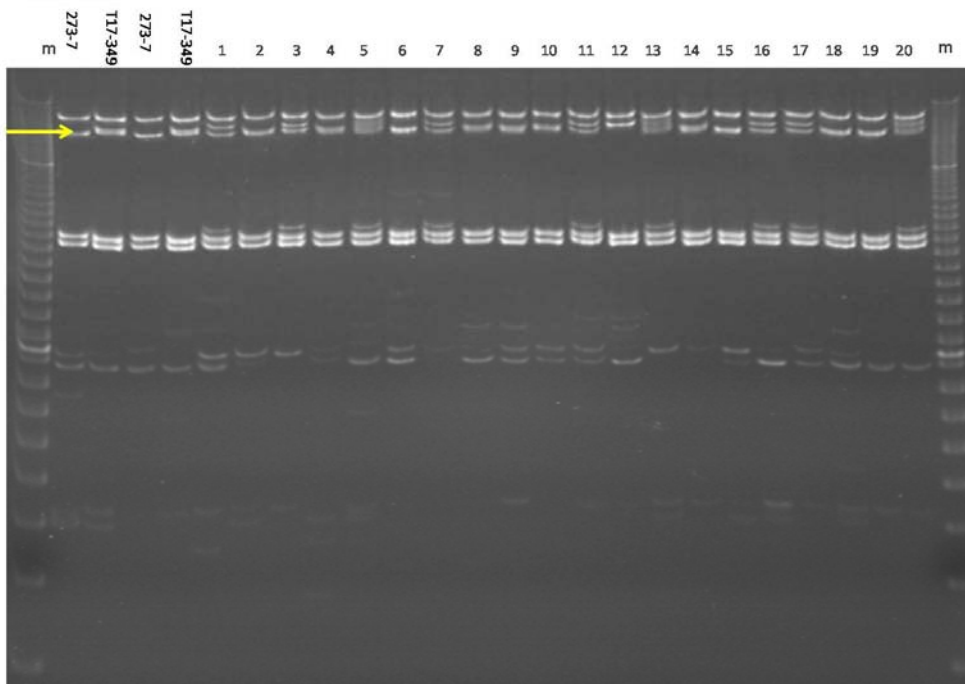

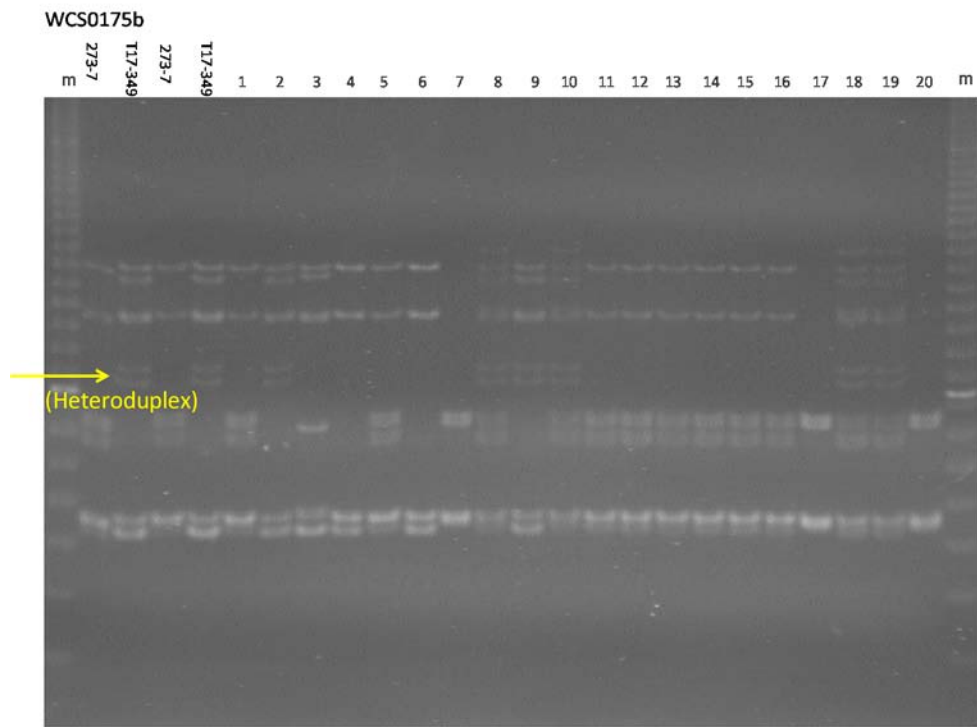

**Figure S5** List of loci with identified LD showing  $r^2 > 0.5$  between loci mapped onto different linkage groups, and photographs of acrylamide gel electrophoresis of PCR amplicons of the listed loci. The numbers above the acrylamide gel lanes represent IDs of  $F_1$  individuals; m represents 20 bp ladder markers. Yellow arrows indicate scored bands for locus genotyping. 'Heteroduplex' shows bands used for scoring loci but predicted as heteroduplex bands.

### Supporting Tables

These supporting tables are available for download at  
<http://www.g3journal.org/lookup/suppl/doi:10.1534/g3.112.002600/-/DC1>.

**Table S1** Primer sequences, SSR motifs, and expected sizes of amplicons of white clover EST-SSR markers.

**Table S2** Locus name, position, and segregation distortion of the integrated and parental-specific maps.

**Table S3** List of the non-redundant white clover ESTs.

**Table S4** Number of mapped multiple loci and loci exhibiting parental-specific polymorphisms.

**Table S5** Locus name and position of an integrated linkage map of red clover developed from a cross between HR and R130.
