# Supplementary material for: Comparative Genetic Mapping and Discovery of Linkage Disequilibrium Across Linkage Groups in White Clover (Trifolium repens L.)
Source: PubMed Central journal article supplement (PMC3362943; doi:10.1534/g3.112.002600), 2012-05-01
Supplement: supp_2.5.607_FigureS1.pdf [file supp_2.5.607_FigureS1.pdf]

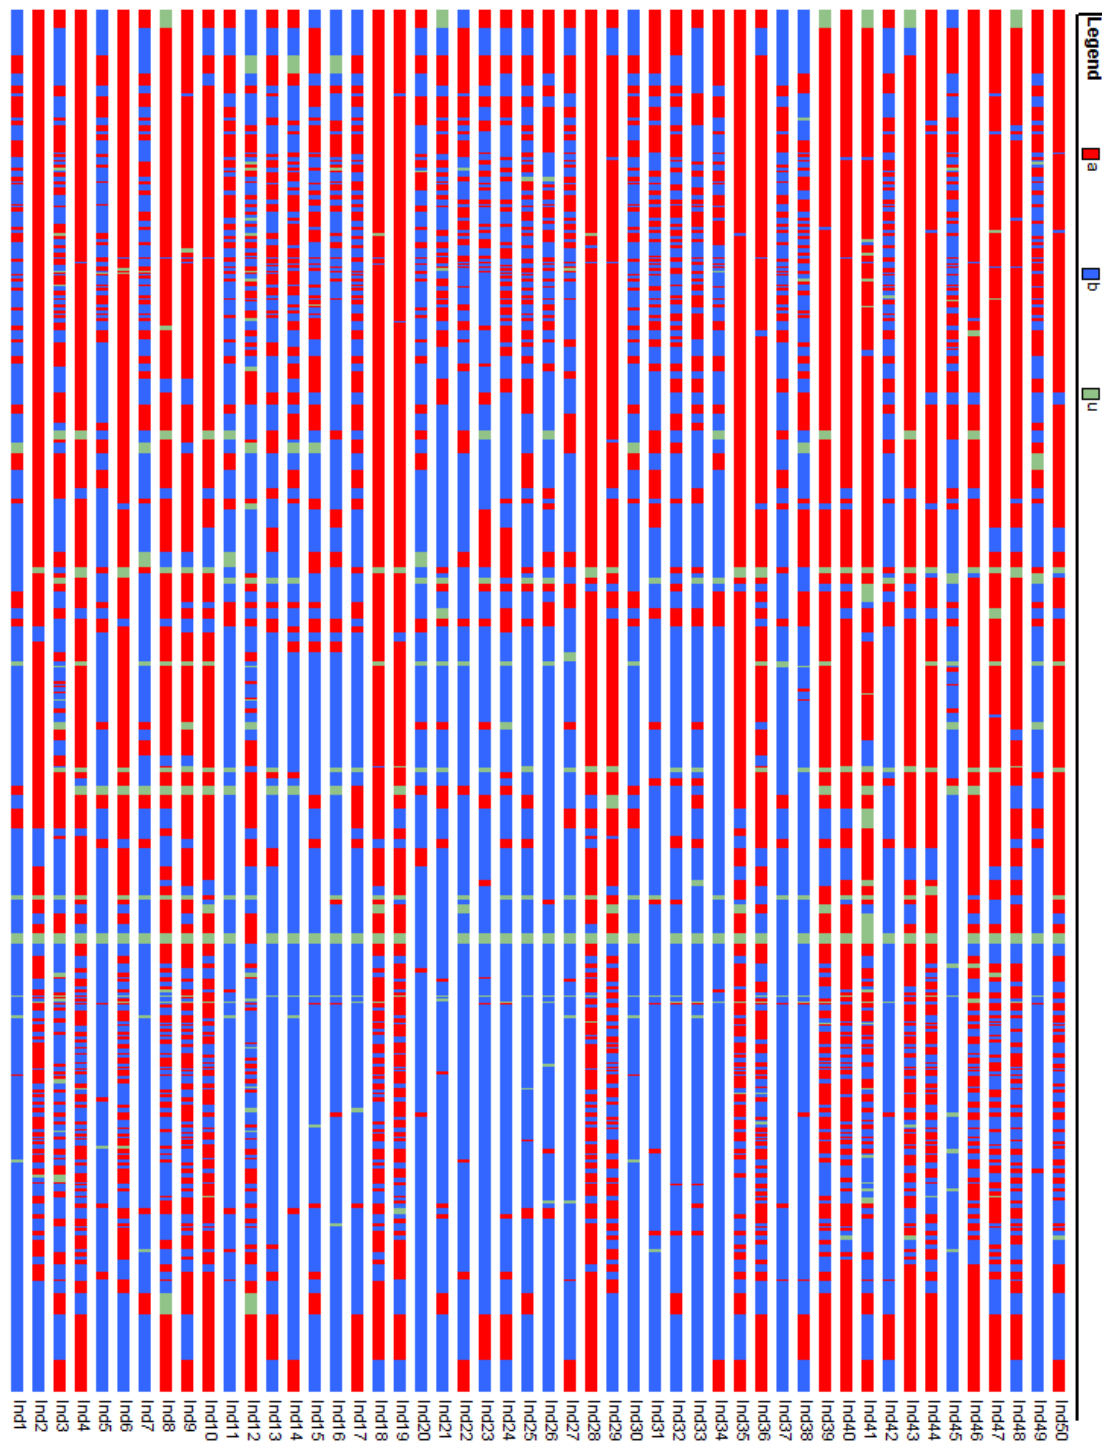

**Figure S1** Graphical genotypes of the largest linkage groups of the 'T17-349'-specific map constructed before disassembling the locus data. The linkage group consisted of a total of 296 loci. Graphical genotypes are shown for 50 of the 188  $F_1$  mapping population. Red and blue colors show the two haplotypes of 'T17-349'. Light green color shows missing data.
