# Supplementary material for: Comparative Genetic Mapping and Discovery of Linkage Disequilibrium Across Linkage Groups in White Clover (Trifolium repens L.)
Source: PubMed Central journal article supplement (PMC3362943; doi:10.1534/g3.112.002600), 2012-05-01
Supplement: supp_2.5.607_FigureS3.pdf [file supp_2.5.607_FigureS3.pdf]

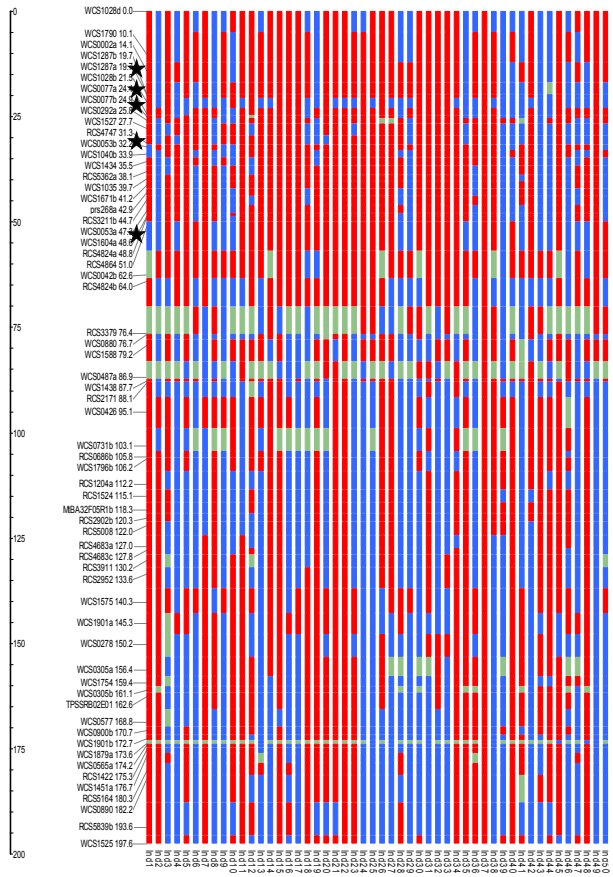

LG2a

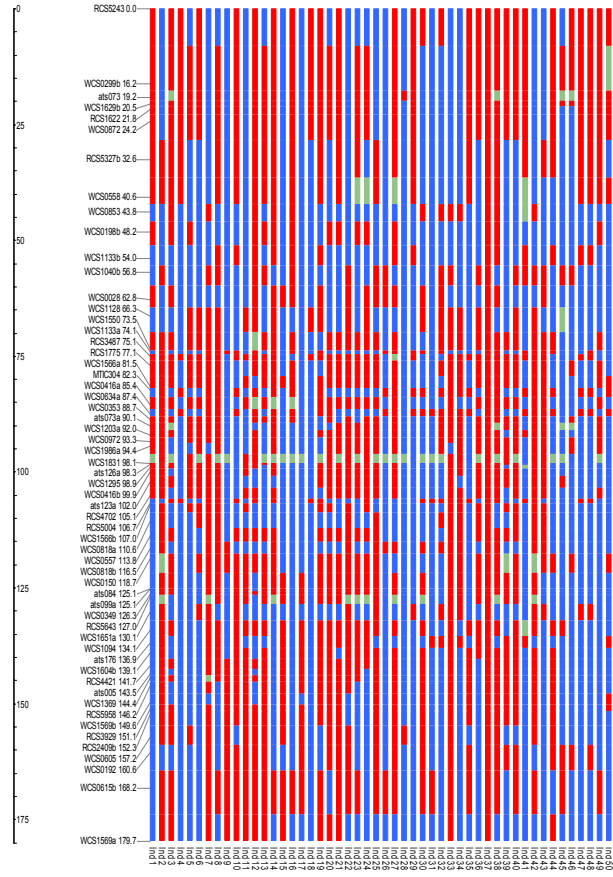

LG2b

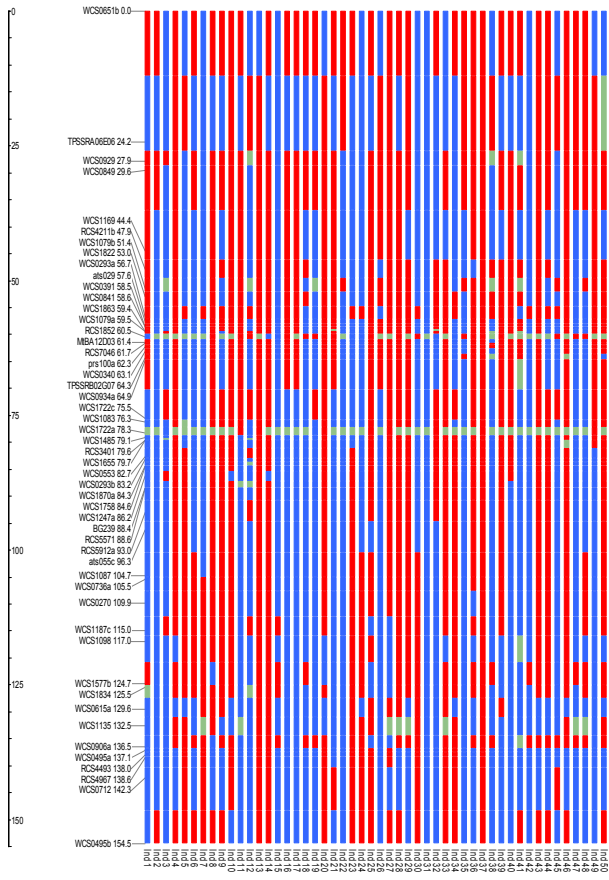

LG3a

cM

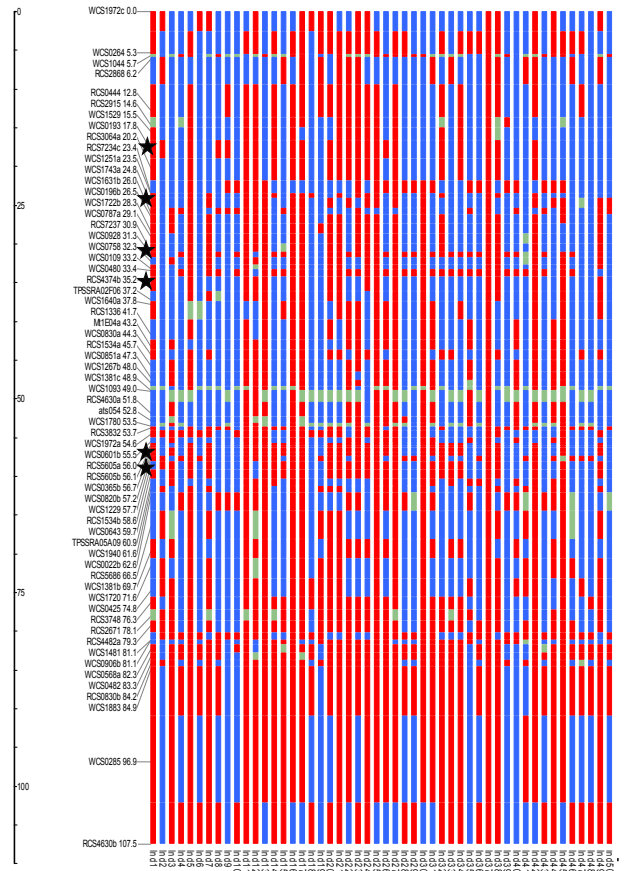

LG3b

cM

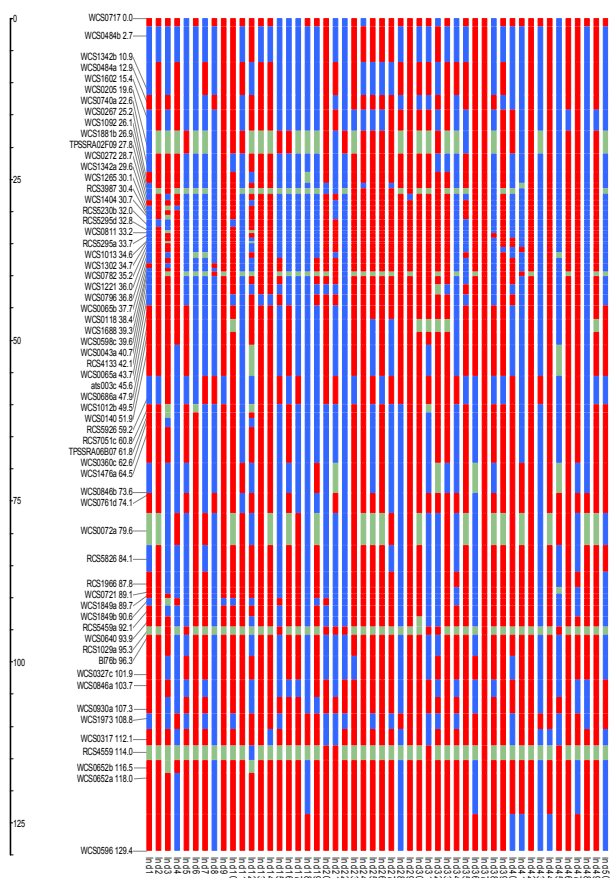

LG4a

cM

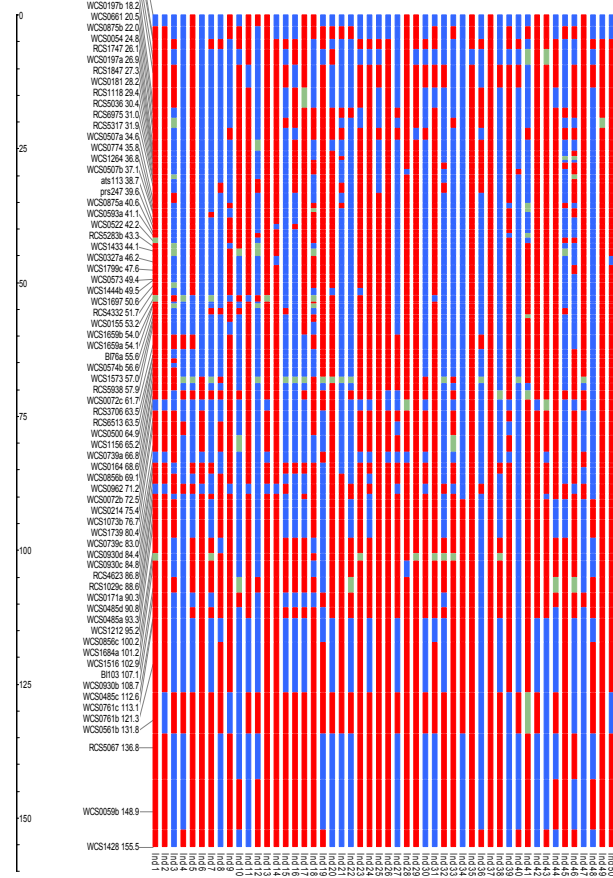

LG4b

cM

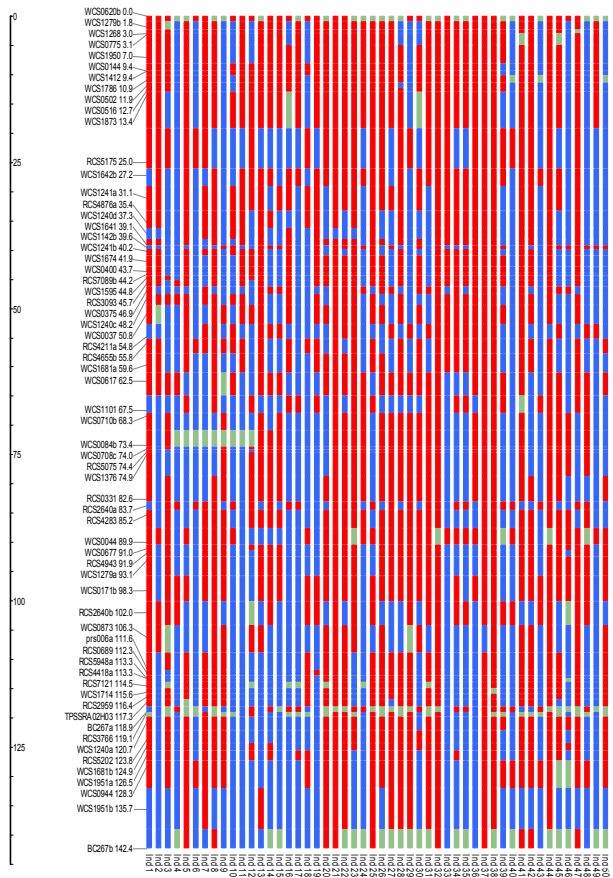

LG5a

cM

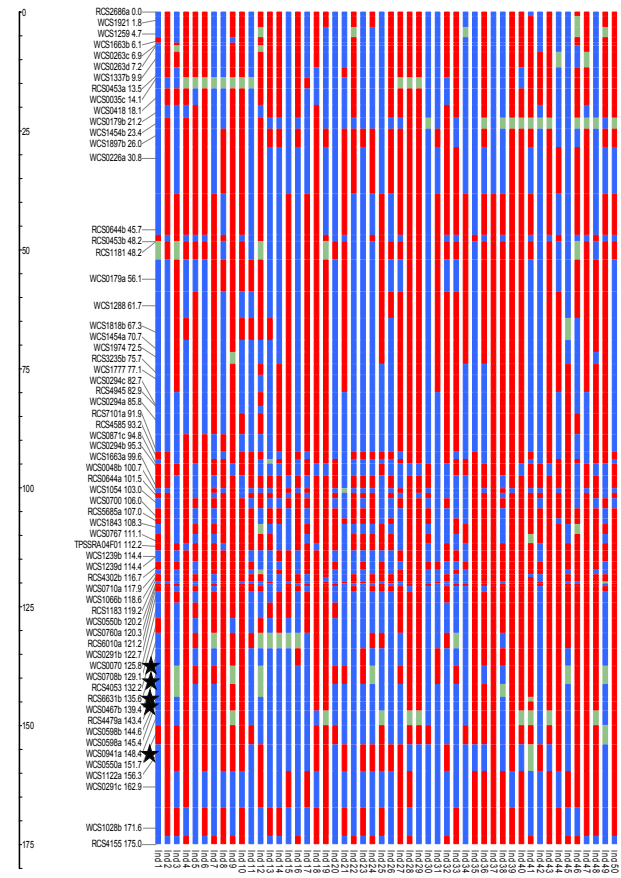

LG5b

cM

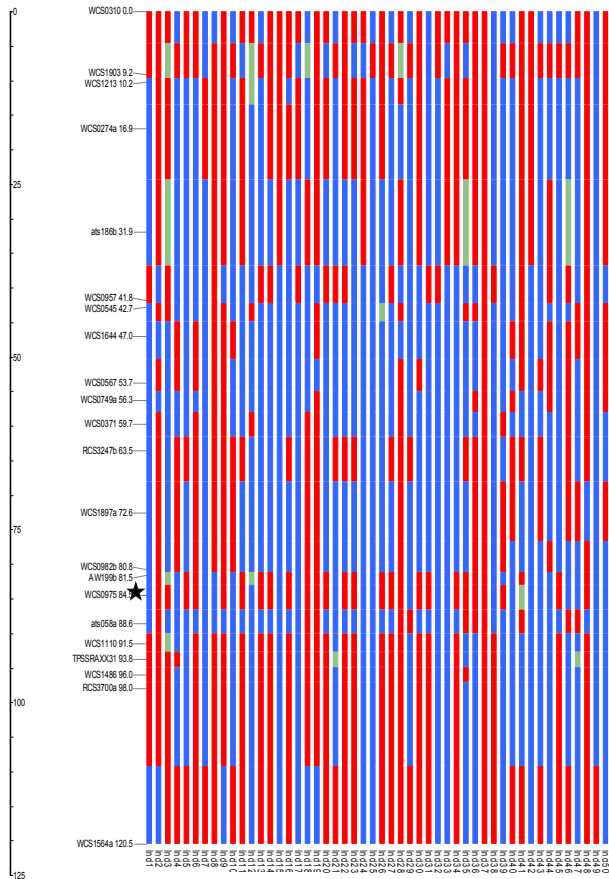

LG6a

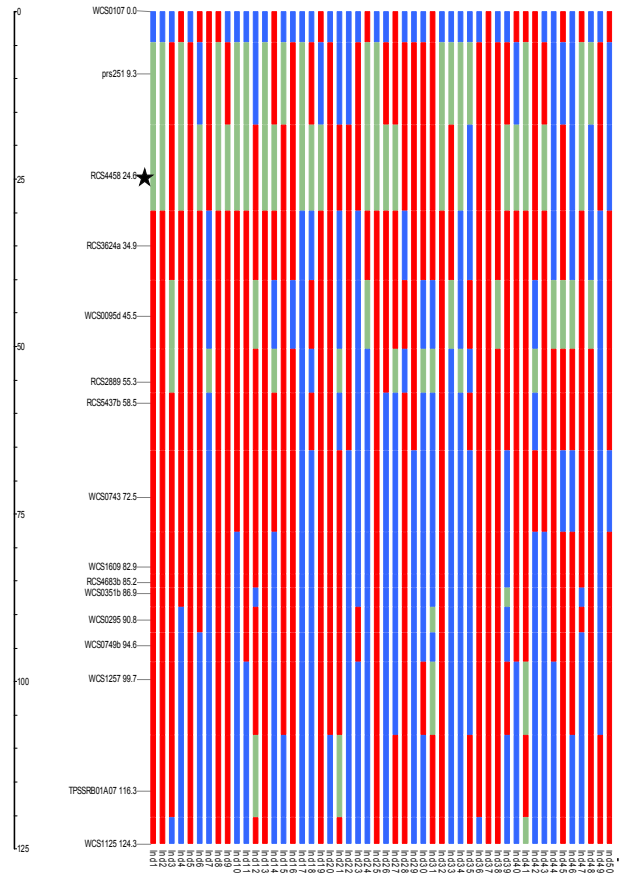

LG6b

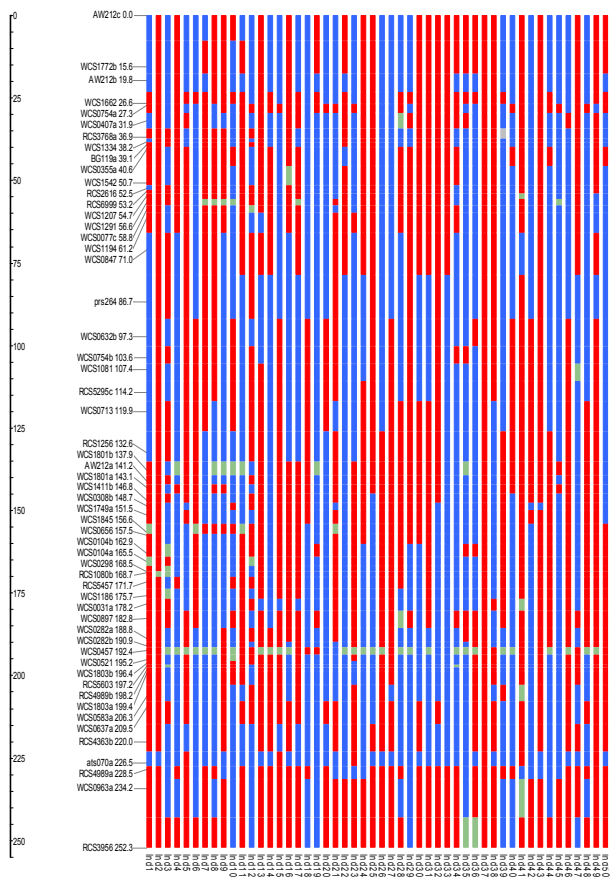

LG7a

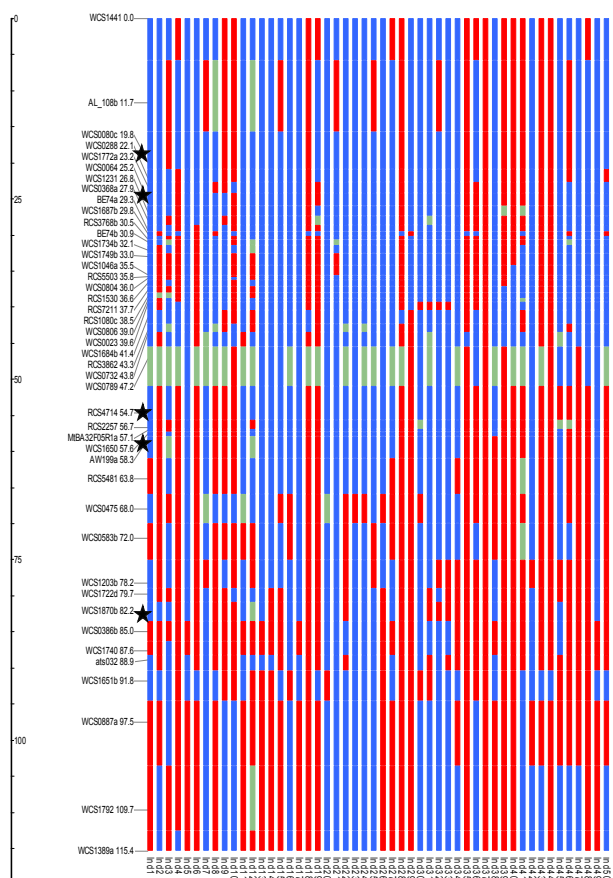

LG7b

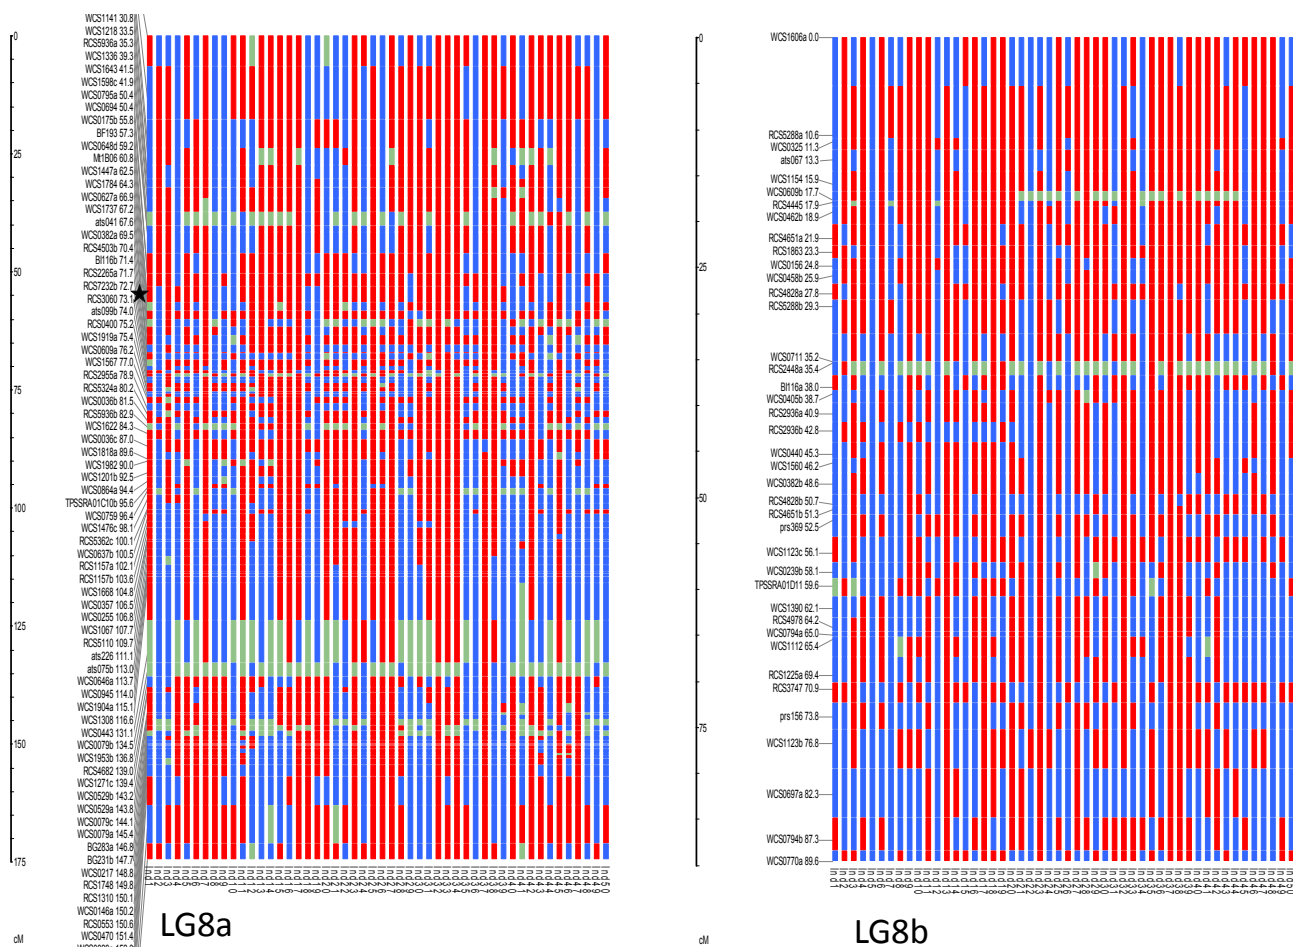

**Figure S3** Graphical genotypes of 50 of the 188 F<sub>1</sub> populations mapped onto the largest linkage group shown in Figure S1. The red and blue colors show the two haplotypes of 'T17-349'. The light green color shows missing data. Black stars indicate loci showing a high LD ( $r^2 > 0.5$ ) between loci mapped onto different linkage groups.
