# Supplementary material for: Comparative Genetic Mapping and Discovery of Linkage Disequilibrium Across Linkage Groups in White Clover (Trifolium repens L.)
Source: PubMed Central journal article supplement (PMC3362943; doi:10.1534/g3.112.002600), 2012-05-01
Supplement: supp_2.5.607_FigureS4.pdf [file supp_2.5.607_FigureS4.pdf]

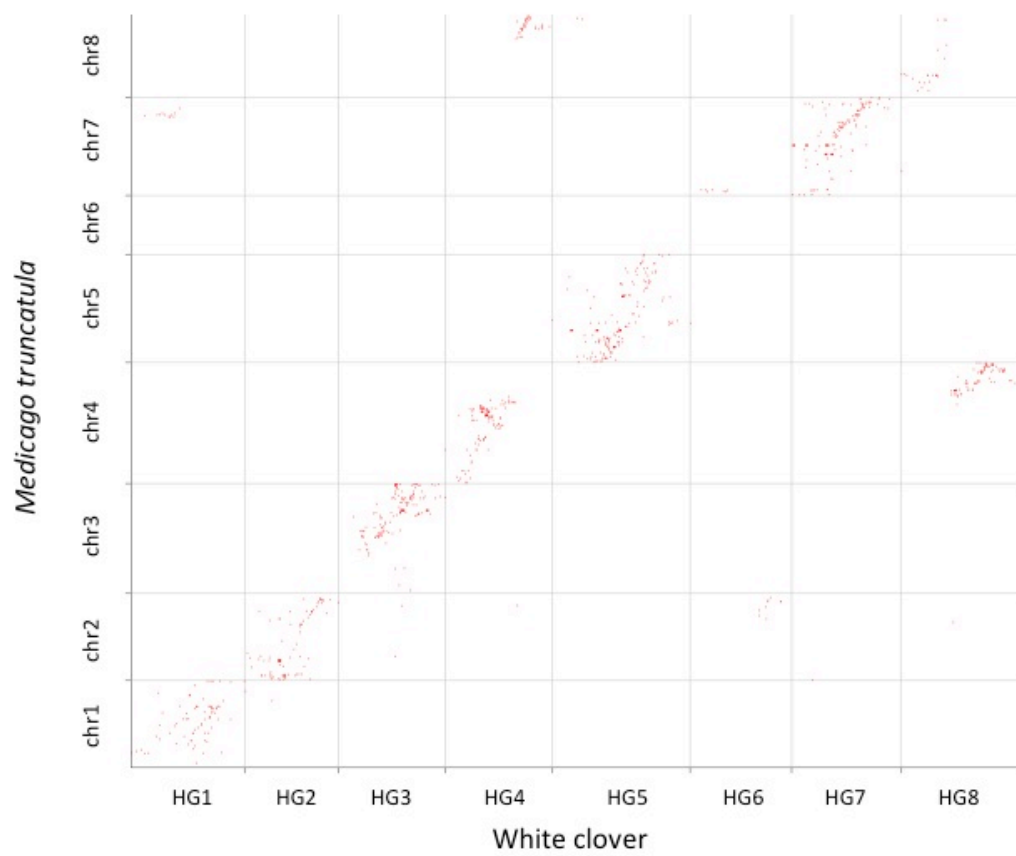

**Figure S4** Graphical view of syntenic blocks between white clover and *M. truncatula*. X and Y axis show position on mapped markers on an white clover linkage map and chromosomes of *M. truncatula* genome, respectively.
