# Supplementary material for: Comparative Genetic Mapping and Discovery of Linkage Disequilibrium Across Linkage Groups in White Clover (Trifolium repens L.)
Source: PubMed Central journal article supplement (PMC3362943; doi:10.1534/g3.112.002600), 2012-05-01
Supplement: supp_2.5.607_FigureS5.pdf [file supp_2.5.607_FigureS5.pdf]

List of loci identified LD showing  $r^2 > 0.5$  between loci mapped onto different linkage groups.

| Mapped LG | Locus name | Mapped LG | Locus name |
|-----------|------------|-----------|------------|
| 1a        | RCS1500    | 3b        | WCS0643    |
| 1a        | RCS2807    | 3b        | WCS1743a   |
| 1a        | RCS5289a   | 5b        | RCS6631b   |
| 1a        | WCS0251    | 5b        | WCS0467b   |
| 1a        | WCS1106    | 5b        | WCS0598a   |
| 1a        | WCS1364    | 5b        | WCS0598b   |
| 1a        | WCS1401    | 5b        | WCS1122a   |
| 1b        | WCS0487b   | 6a        | WCS0975    |
| 2a        | RCS4747    | 6b        | RCS4458    |
| 2a        | RCS4864    | 7b        | ats032     |
| 2a        | WCS0002a   | 7b        | AW199a     |
| 2a        | WCS0077a   | 7b        | RCS4714    |
| 2a        | WCS1287b   | 7b        | WCS0064    |
| 3b        | RCS3064a   | 7b        | WCS0080c   |
| 3b        | RCS4374b   | 7b        | WCS1870b   |
| 3b        | RCS5605a   | 8a        | WCS0175b   |
| 3b        | RCS7237    |           |            |

RCS1500

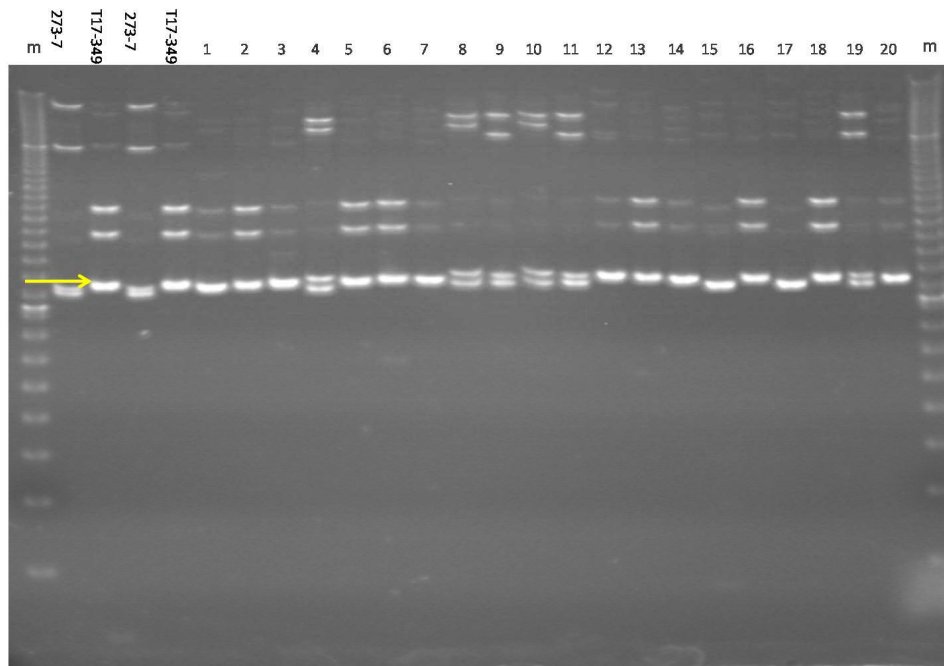

RCS2807

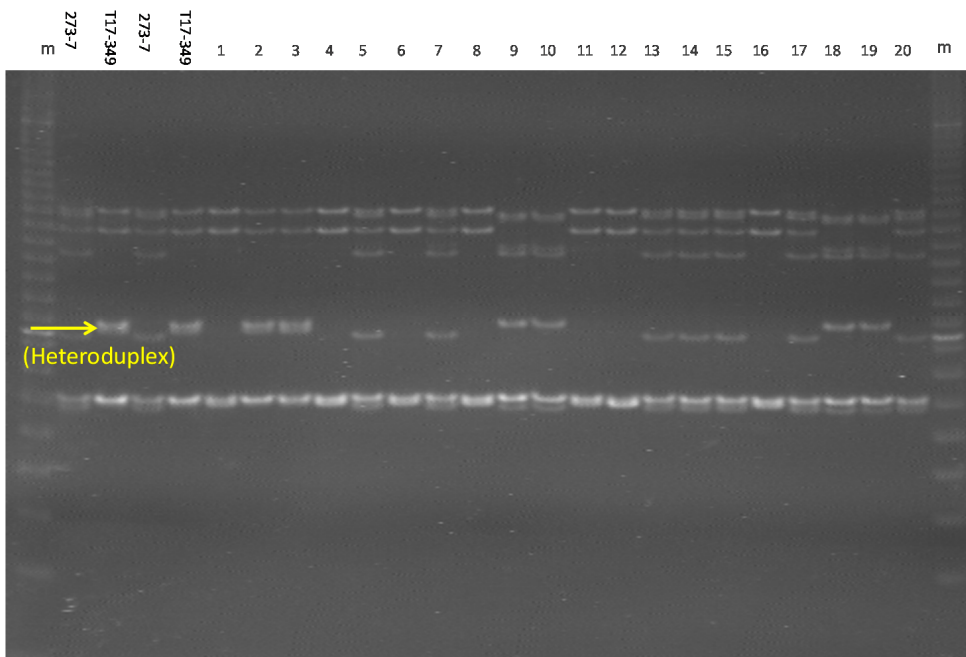

RCS5289a

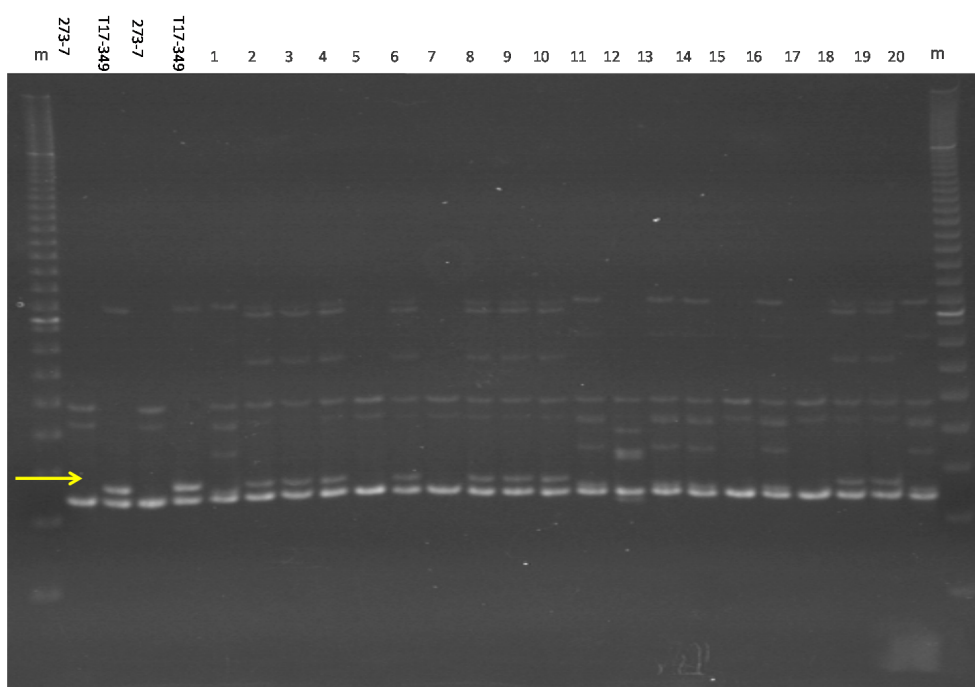

WCS0251

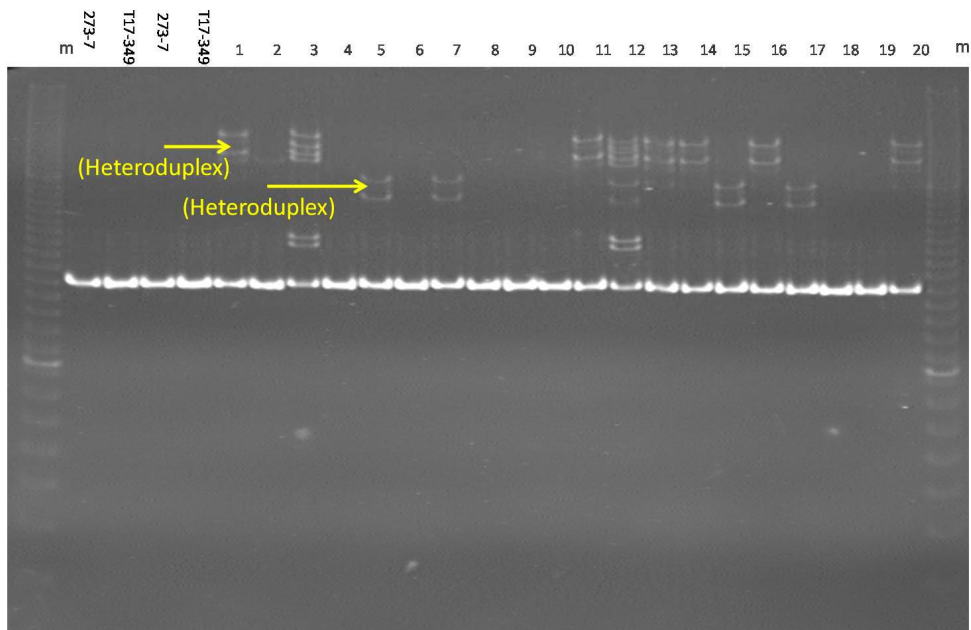

WCS1106

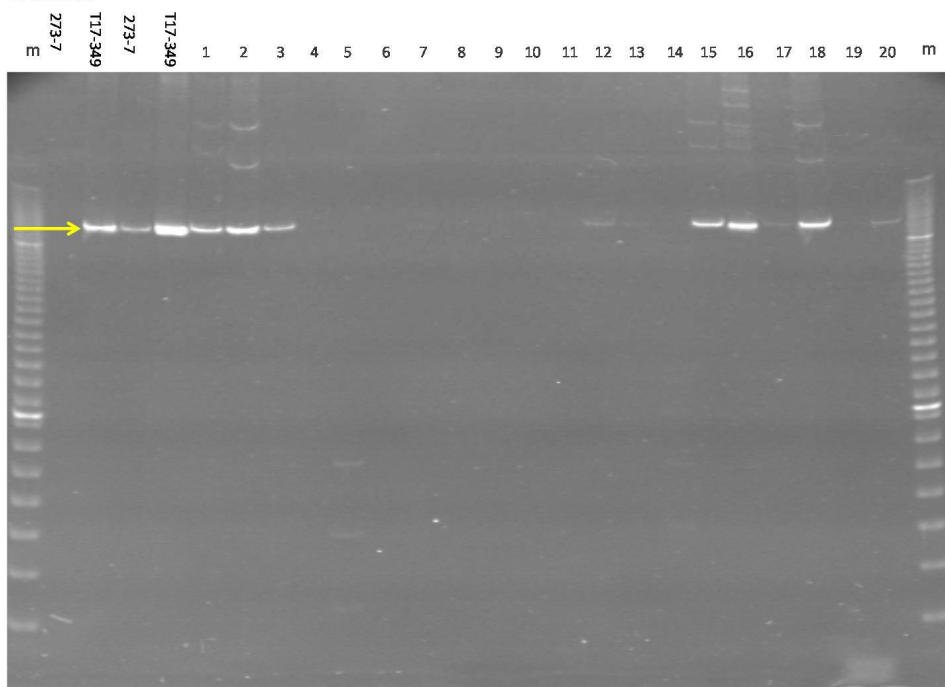

WCS1364

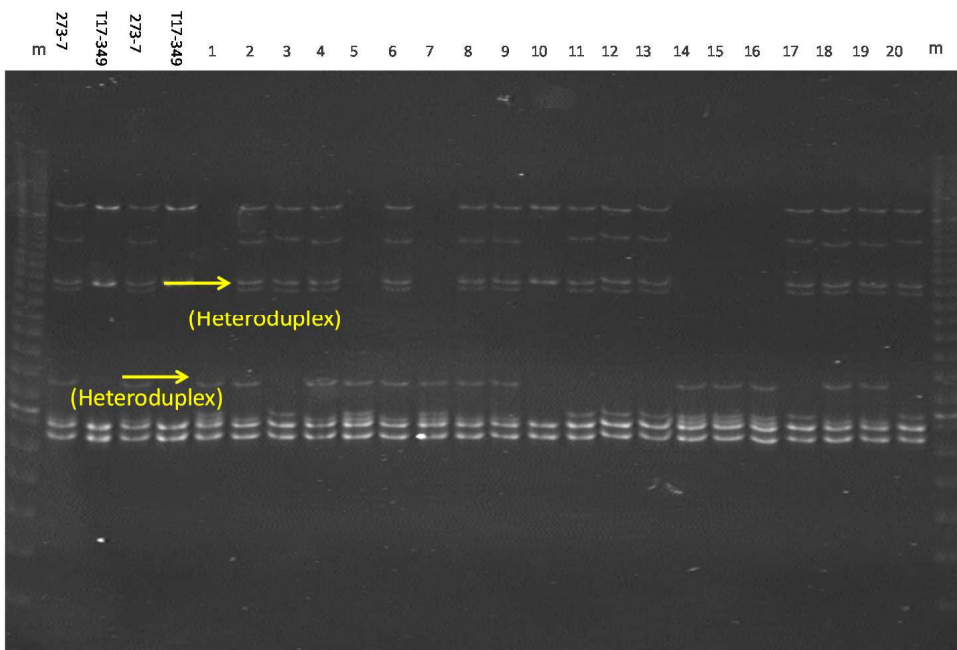

WCS1401

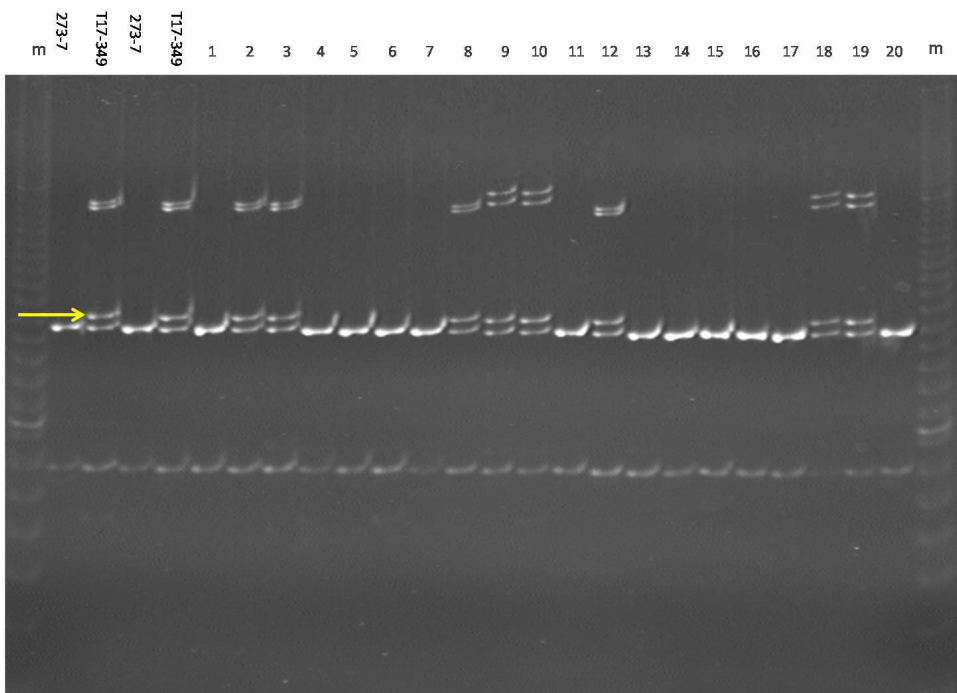



WCS0487b

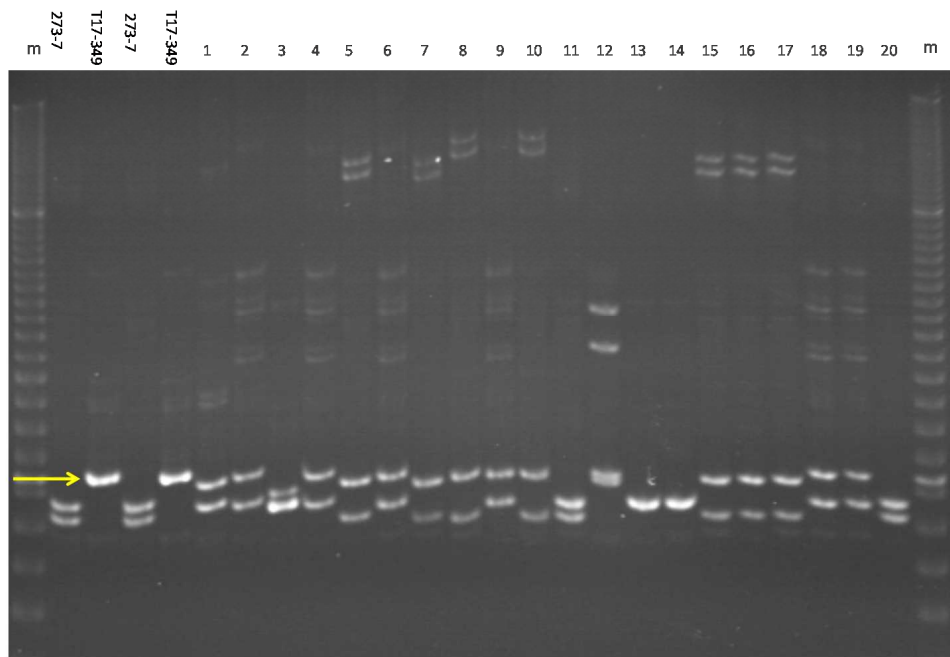

RCS4747

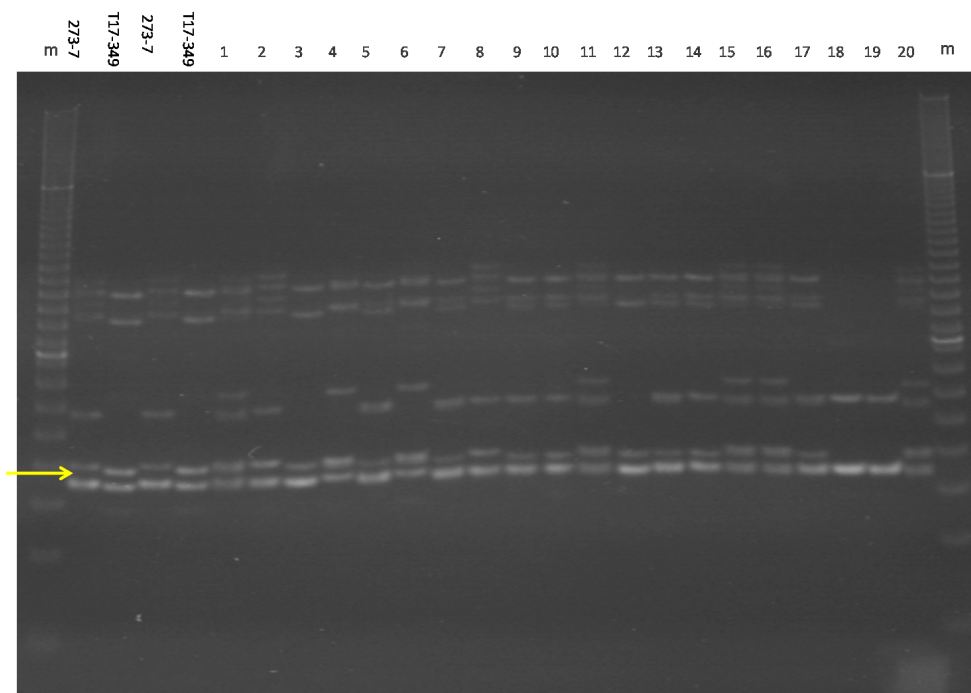

RCS4864

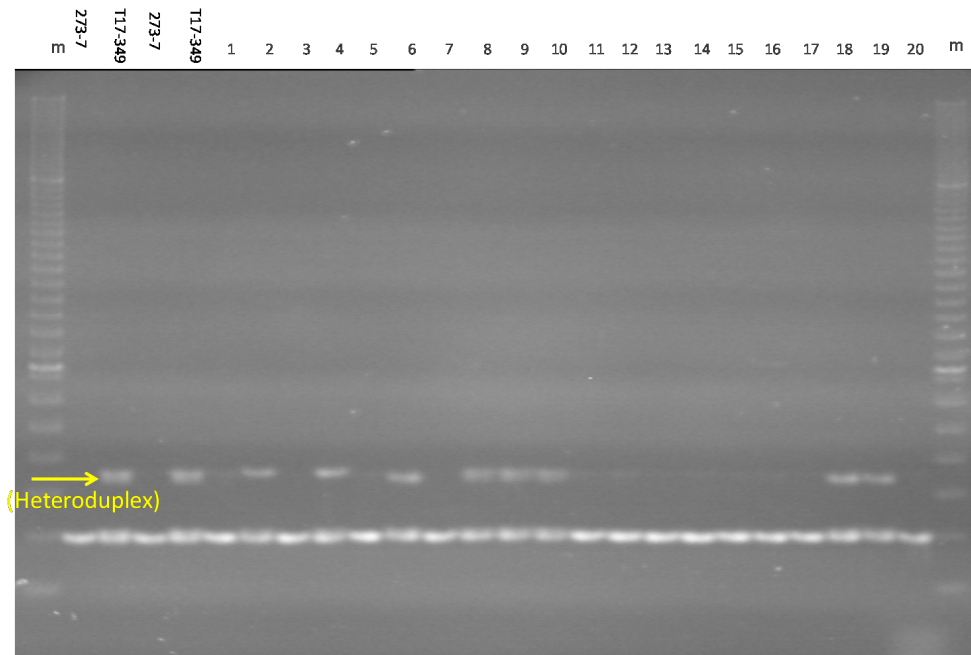

WCS0002a

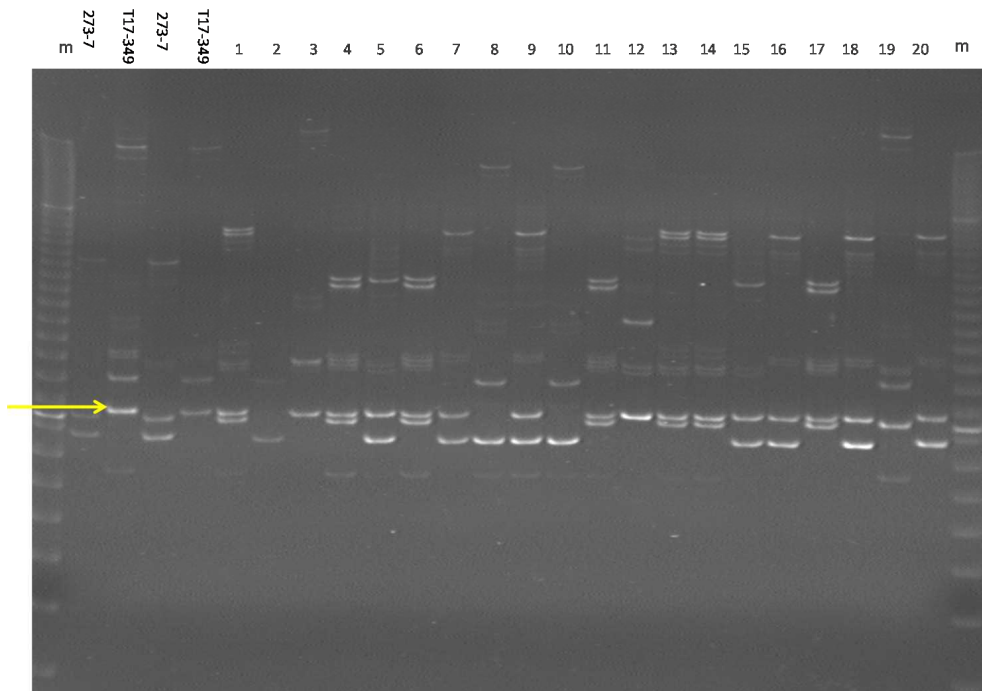

WCS00077a

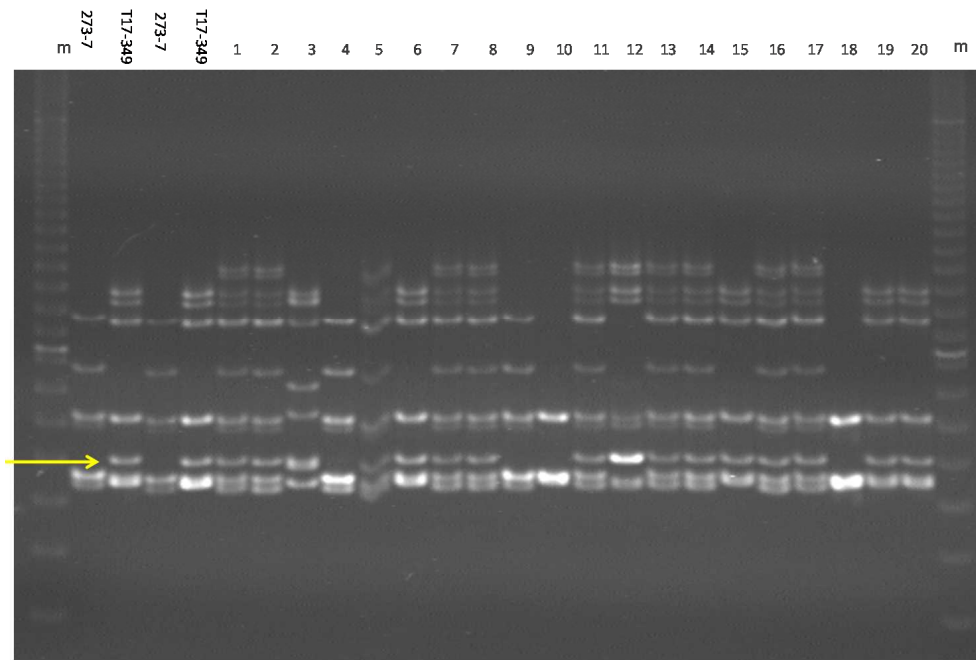

WCS1287b

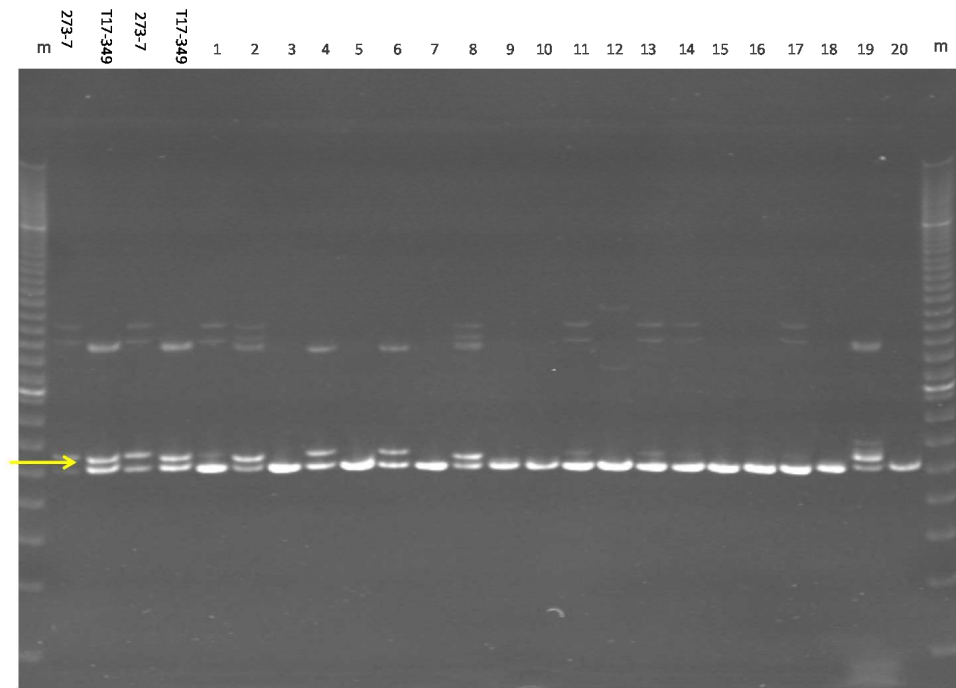

RCS3064a

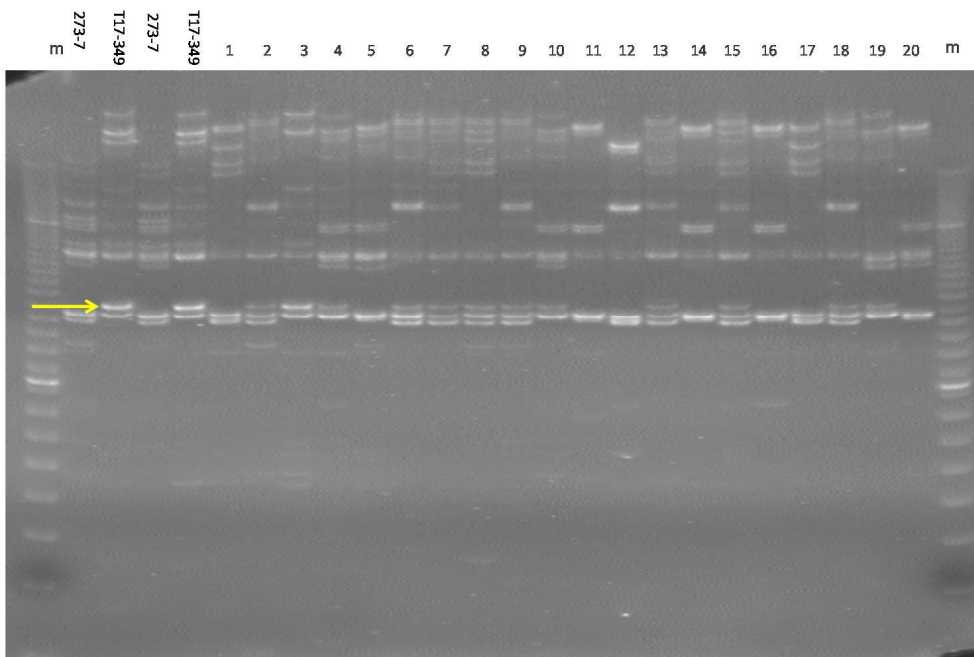

RCS4374b

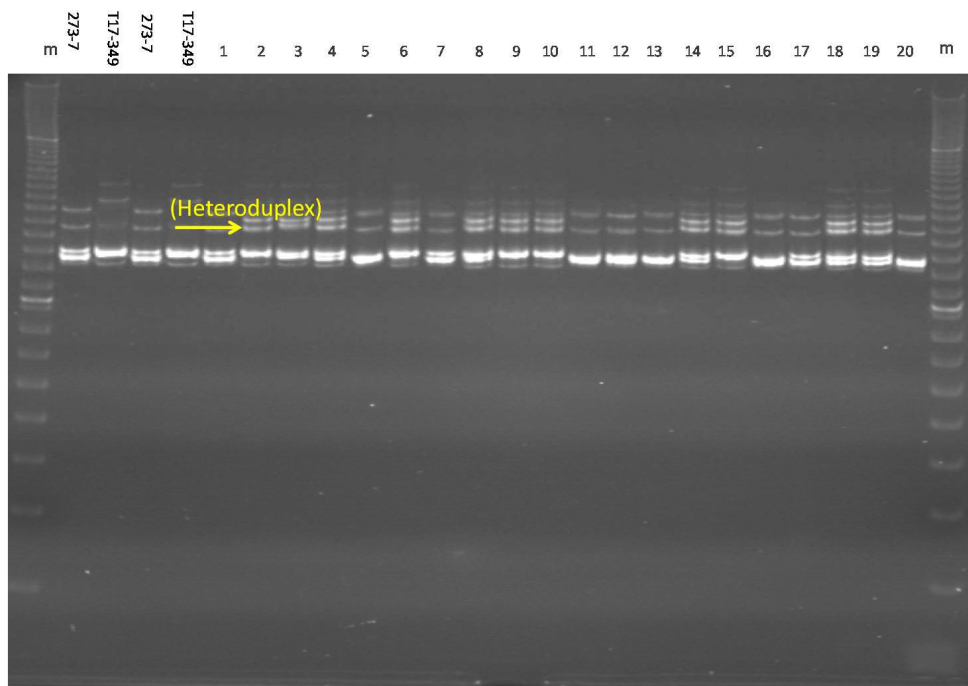

RCS5605a

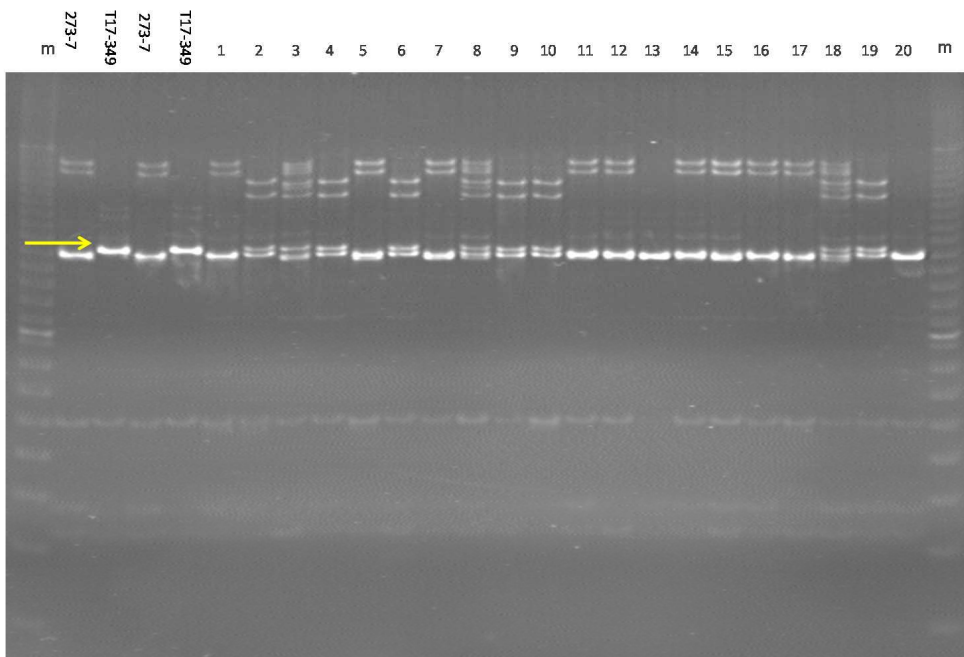

RCS7237

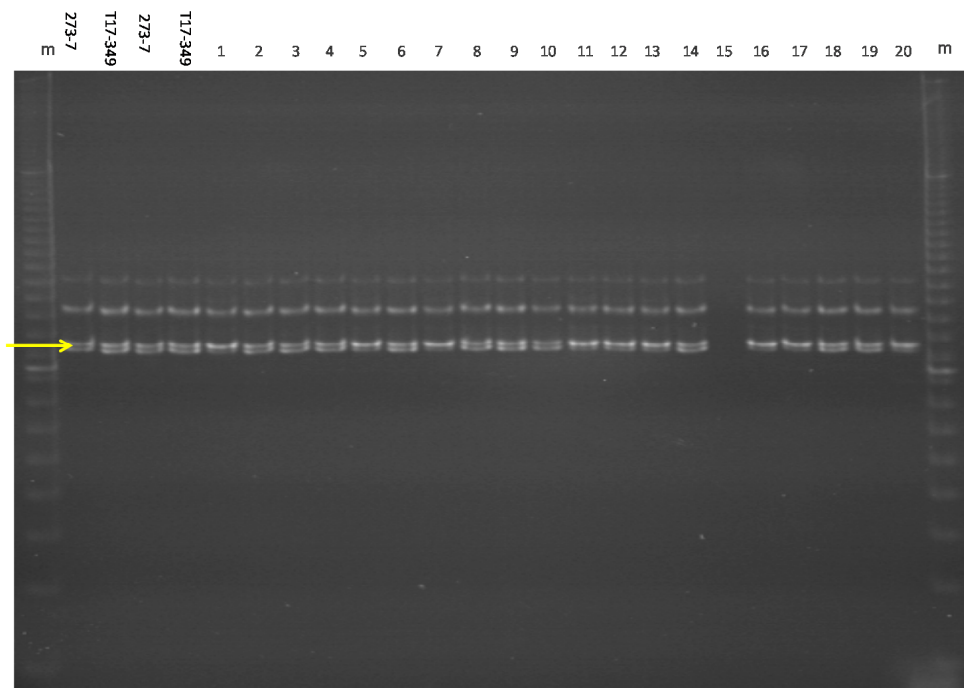

WCS0643

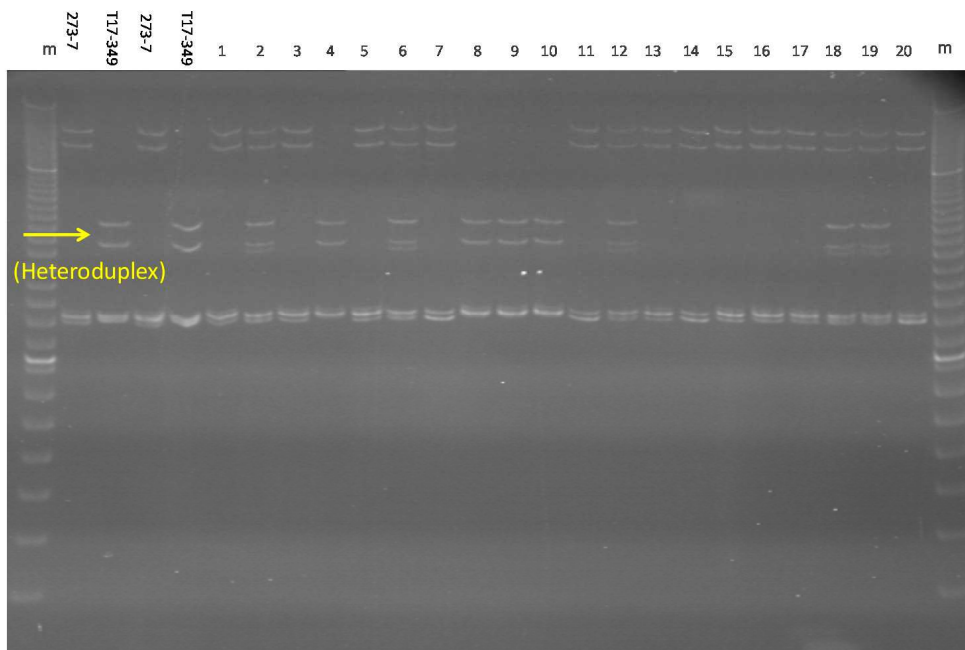

WCS1743a

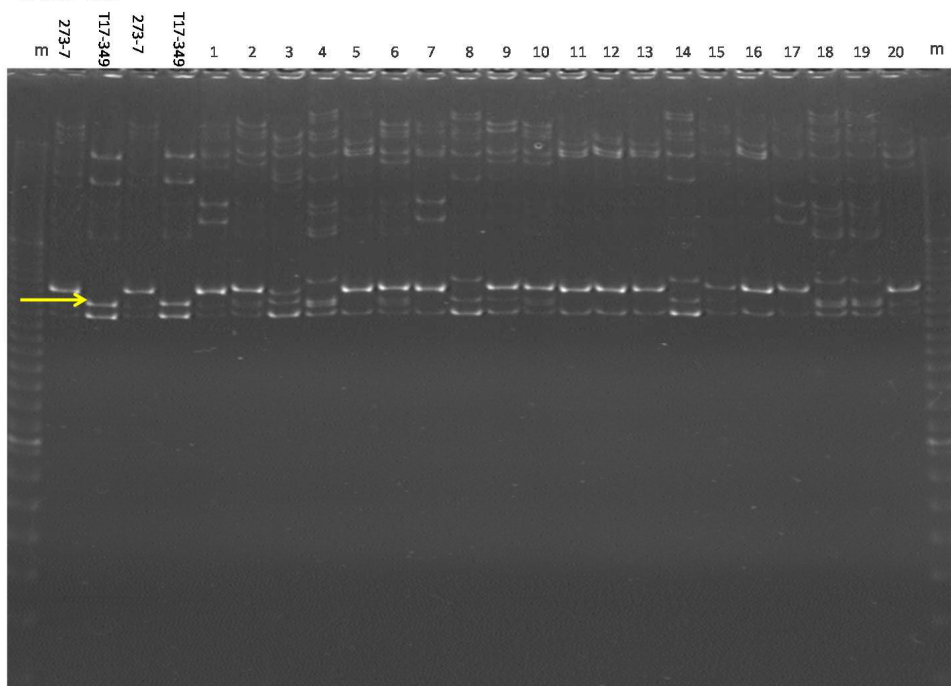



RCS6631b

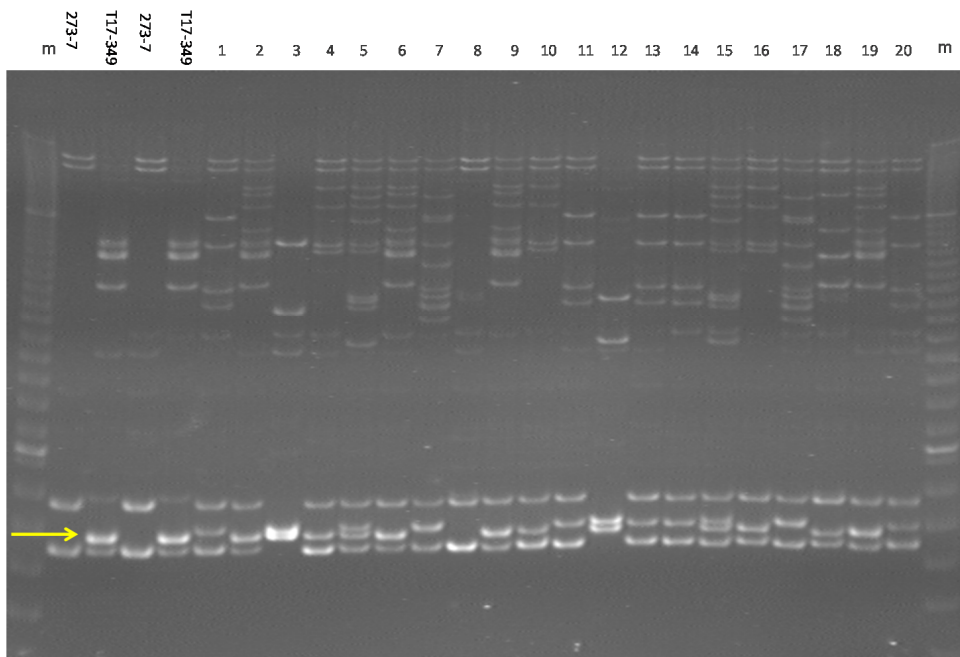

WCS0467b

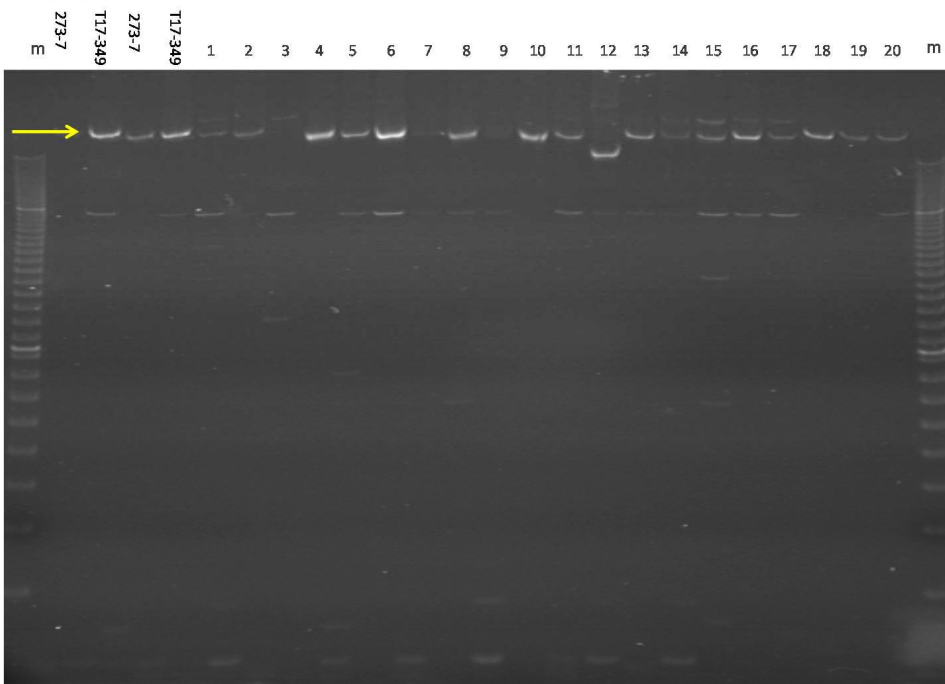



WCS0598a and WCS0598b

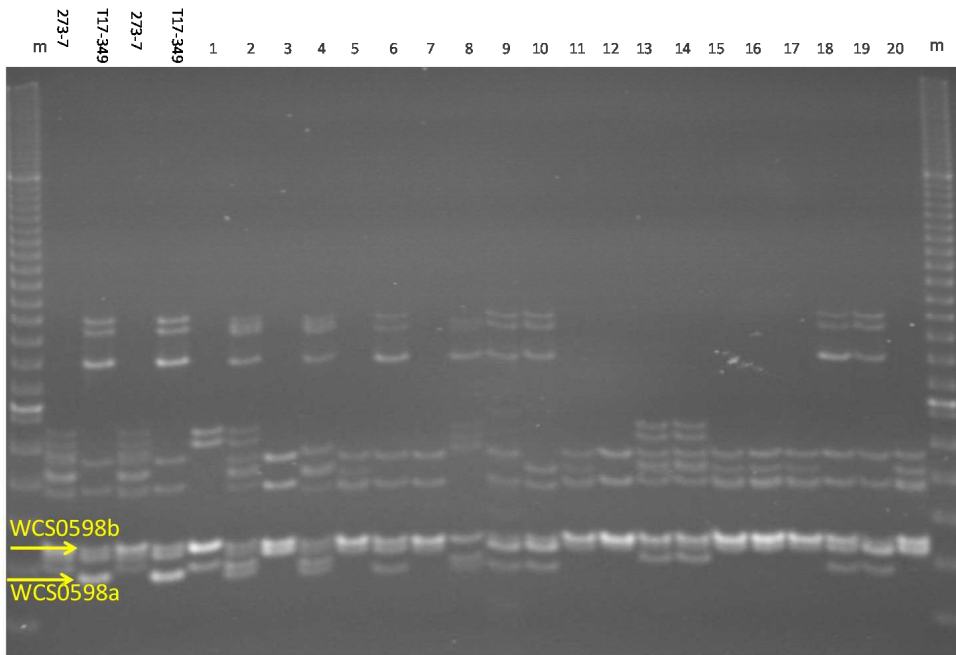

WCS1122a

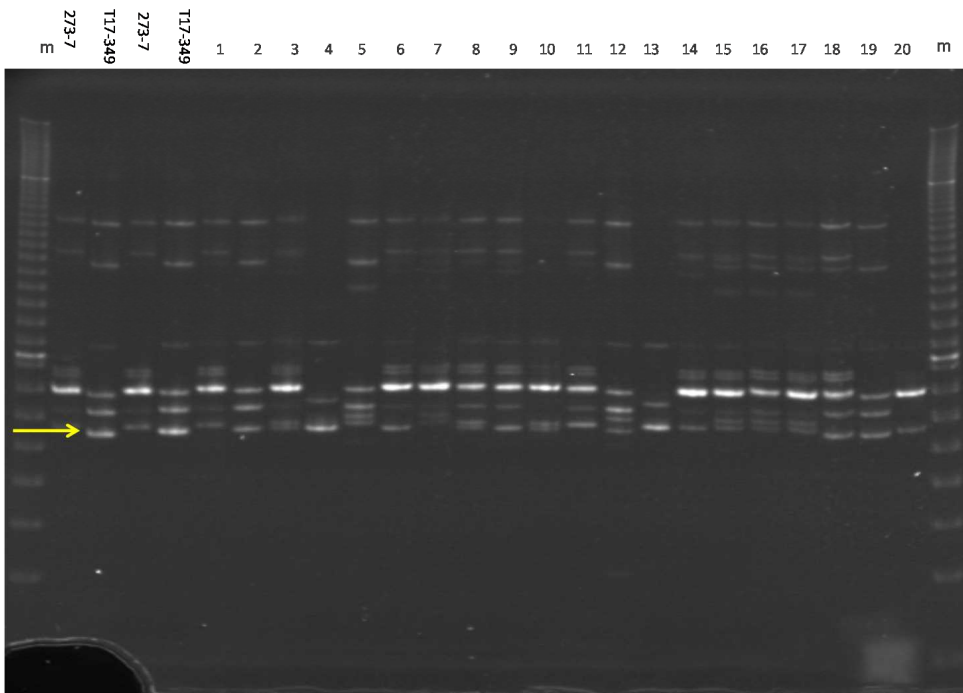

WCS0975

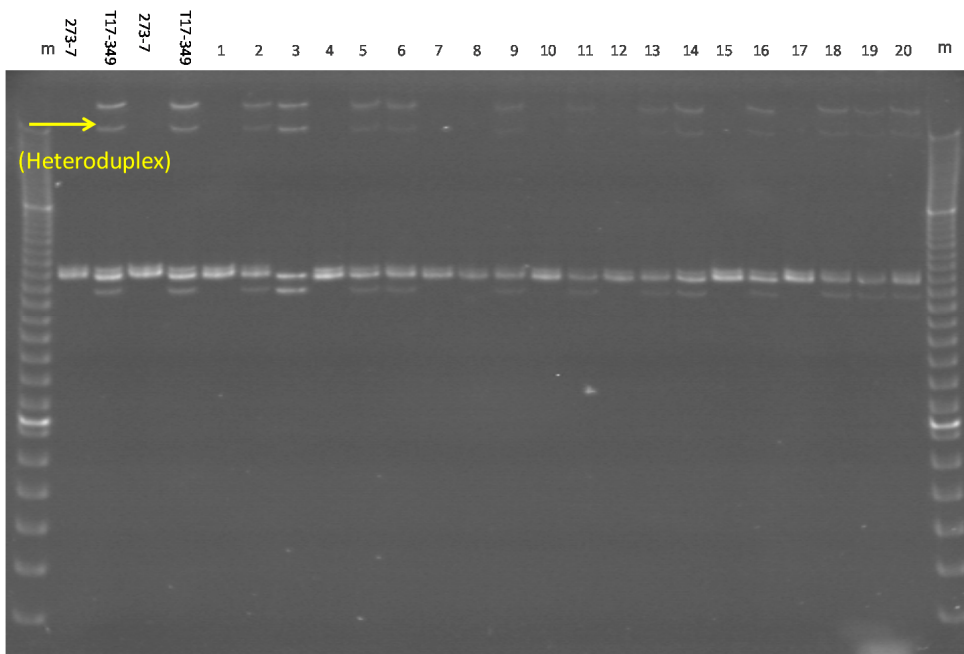

RCS4458

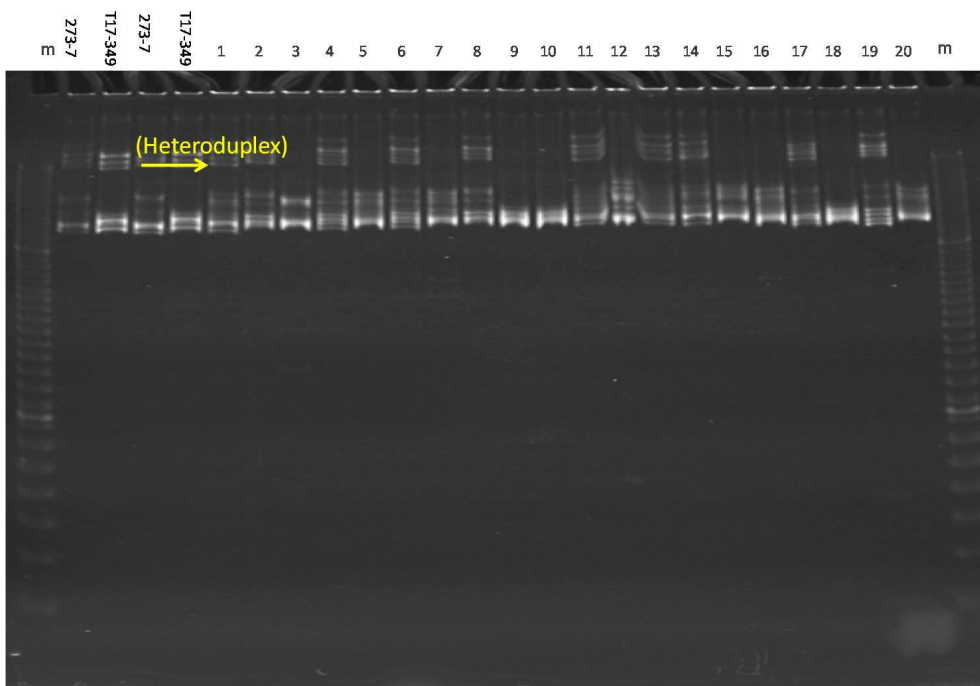

ats032

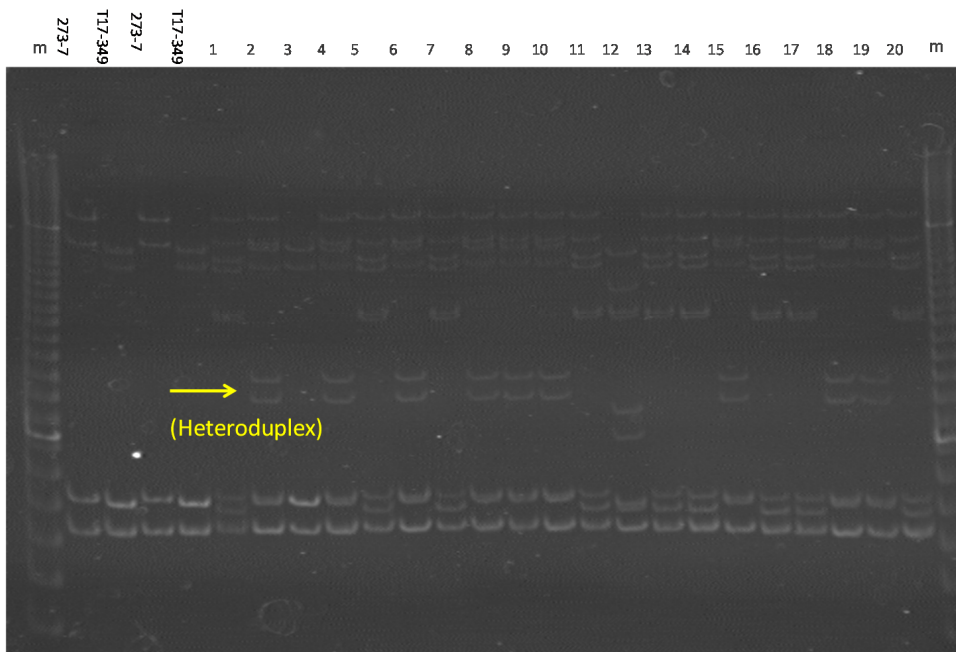

AW199a

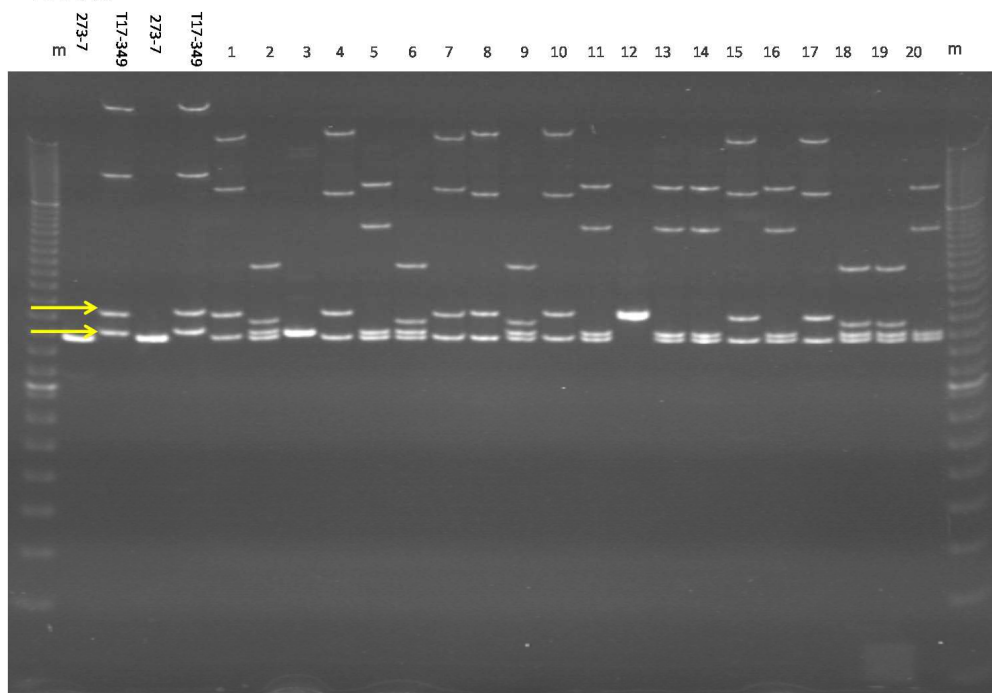

RCS4714

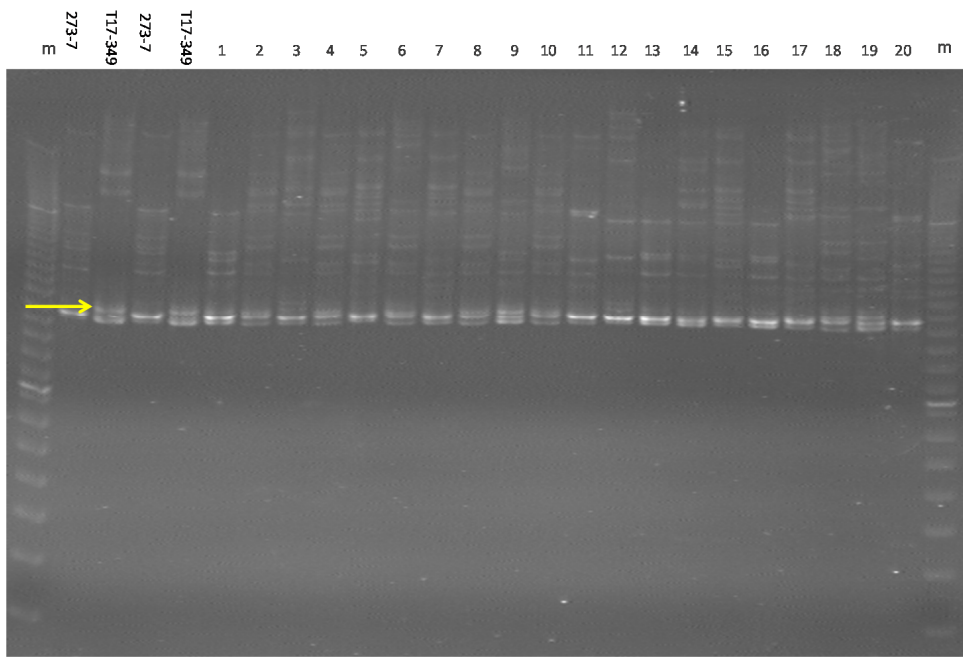

WCS0064

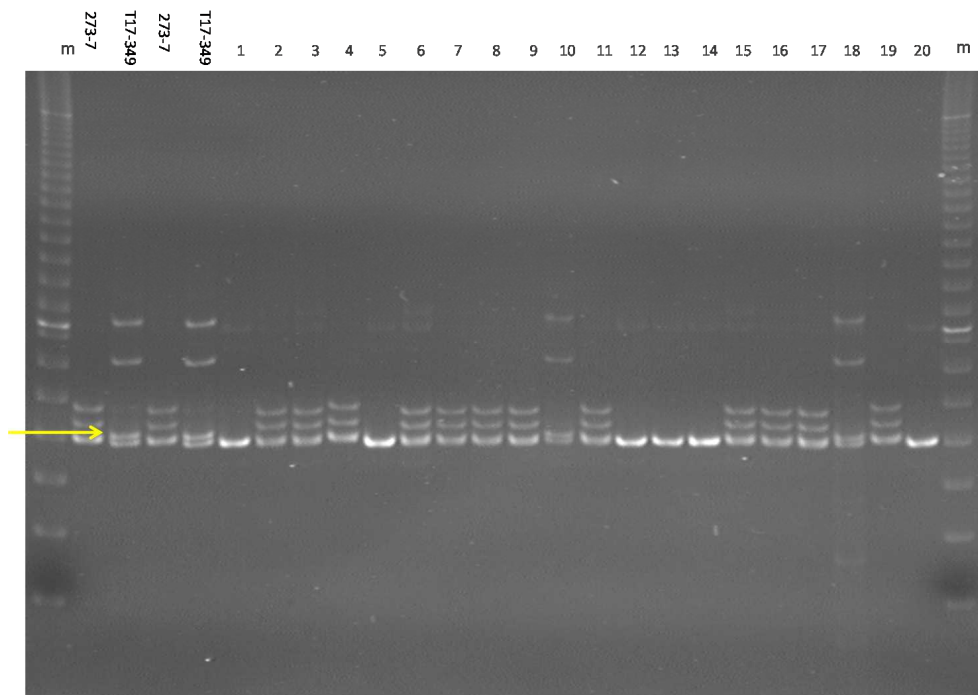

WCS0080c

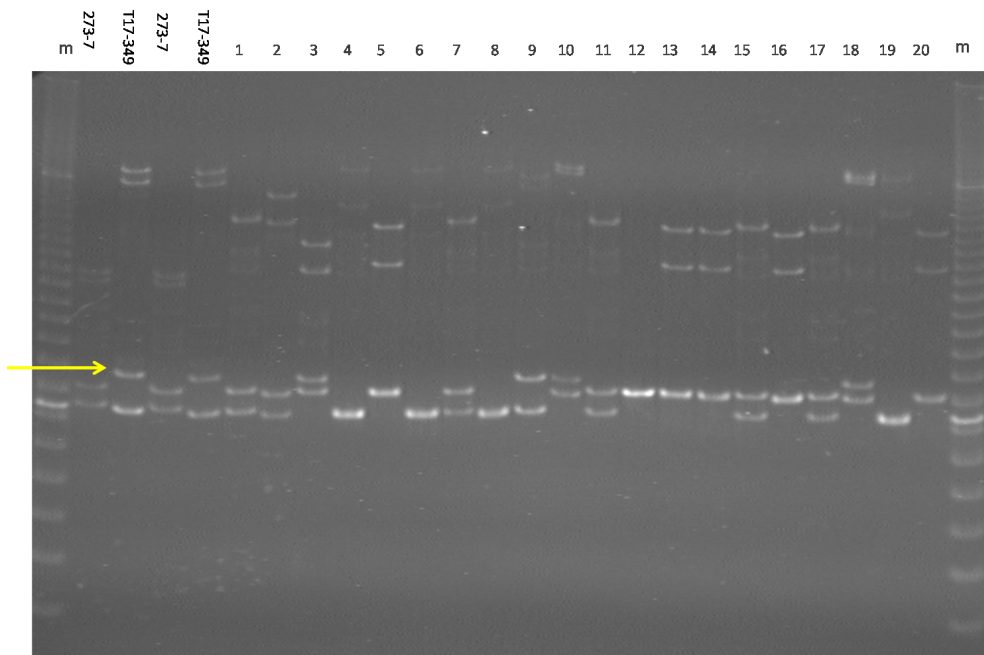

WCS1870b

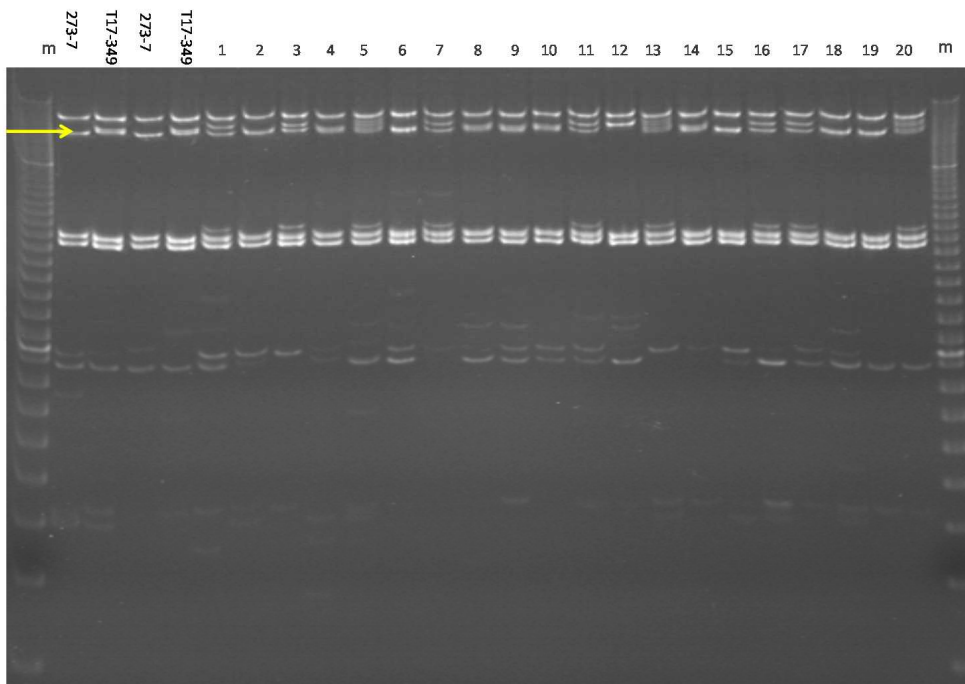

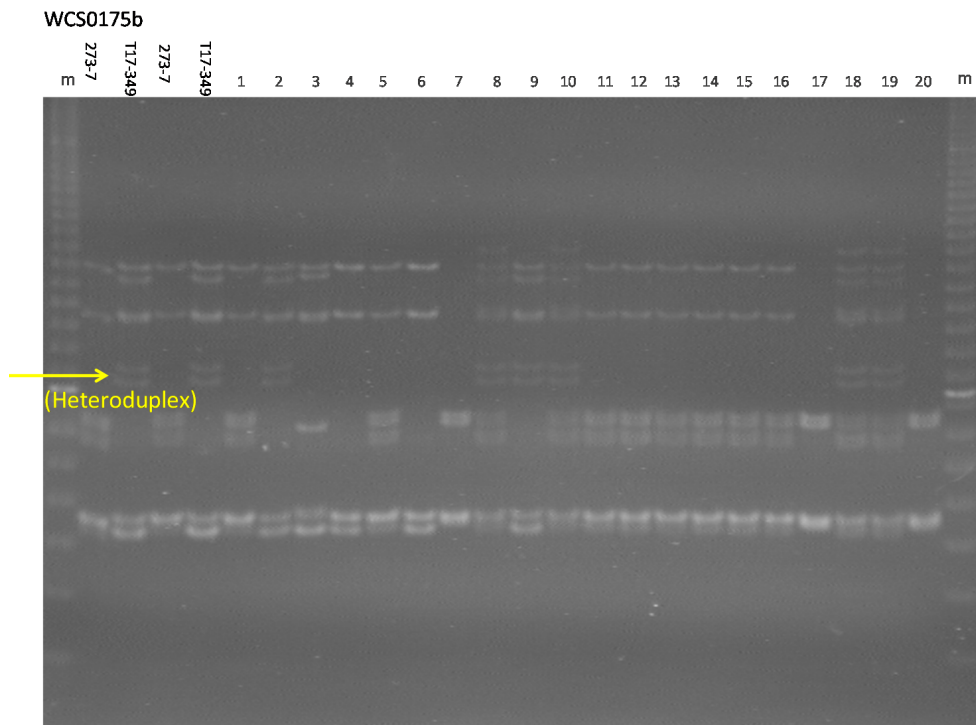

**Figure S5** List of loci with identified LD showing  $r^2 > 0.5$  between loci mapped onto different linkage groups, and photographs of acrylamide gel electrophoresis of PCR amplicons of the listed loci. The numbers above the acrylamide gel lanes represent IDs of  $F_1$  individuals; m represents 20 bp ladder markers. Yellow arrows indicate scored bands for locus genotyping. 'Heteroduplex' shows bands used for scoring loci but predicted as heteroduplex bands.
